# Supplementary material for: Fungal-specific PCR primers developed for analysis of the ITS region of environmental DNA extracts
Source: PubMed Central journal article supplement (PMC1156903; doi:10.1186/1471-2180-5-28), 2005-05-18
Supplement: 1471-2180-5-28-S1.pdf [file 1471-2180-5-28-S1.pdf]

| Accession Number | Genus        | Species         | 5.8S | 58A2R<br>58A1F | 3' C G A T G A A G A A C G C<br>A T G A A G A A C G C A G 3' | Species per cluster | Cluster number |
|------------------|--------------|-----------------|------|----------------|--------------------------------------------------------------|---------------------|----------------|
| AF165922         | Glomus       | brasilianum     |      |                |                                                              | 460                 | 1              |
| AY373922         | Penicillium  | lividum         |      |                |                                                              | 460                 | 1              |
| AF374717         | Pisolithus   | tinctorius      |      |                |                                                              | 460                 | 1              |
| AF444442         | Cryptococcus | cellulolyticus  |      |                |                                                              | 460                 | 1              |
| RSRRITSA         | Rhizopogon   | subcaerulescens |      |                |                                                              | 460                 | 1              |
| CGE510274        | Cenococcum   | geophilum       |      |                | -                                                            | 22                  | 2              |
| AY826767         | Septoria     | glycines        |      |                | -                                                            | 22                  | 2              |
| AF270781         | Pisolithus   | sp              |      |                | G                                                            | 2                   | 3              |
| CFR486964        | Calvatia     | fragilis        |      | C              |                                                              | 1                   | 4              |
| AF097575         | Elsinoe      | leucospermi     |      |                | -                                                            | 1                   | 5              |
| AF333489         | Phakopsora   | pachyrhizi      |      |                | A                                                            | 1                   | 6              |
| AF096976         | Pisolithus   | arhizus         |      | A              |                                                              | 1                   | 7              |
| RSRRITSA         | Rhizopogon   | subcaerulescens |      |                |                                                              | 1                   | 8              |
| AF401156         | Acer         | macrophyllum    |      |                |                                                              | 75                  | 9              |
| AF041353         | Pseudotsuga  | menziesii       |      |                |                                                              | 75                  | 9              |
| BFO491208        | Begonia      | formosana       |      |                |                                                              | 68                  | 10             |
| AB162910         | Chlorella    | vulgaris        |      |                |                                                              | 68                  | 10             |
| AF401149         | Acer         | decandrum       |      |                | T C                                                          | 1                   | 11             |

















| Accession Number | Genus            | Species        | 5.8S | 58A2R | 3' | C | G | A | T | G | A | A | G | A | A | C | G | C  | Species per cluster | Cluster number |
|------------------|------------------|----------------|------|-------|----|---|---|---|---|---|---|---|---|---|---|---|---|----|---------------------|----------------|
|                  |                  |                |      | 58A1F | A  | T | G | A | A | G | A | A | C | G | C | A | G | 3' |                     |                |
| AB164370         | Trichosporon     | siamense       |      |       |    |   |   |   |   |   |   |   |   |   |   |   |   |    | 460                 | 1              |
| AF414693         | Trichosporon     | veenhuisii     |      |       |    |   |   |   |   |   |   |   |   |   |   |   |   |    | 460                 | 1              |
| TAB244267        | Trimmatostroma   | abietina       |      |       |    |   |   |   |   |   |   |   |   |   |   |   |   |    | 460                 | 1              |
| AY559362         | Trimmatostroma   | abietis        |      |       |    |   |   |   |   |   |   |   |   |   |   |   |   |    | 460                 | 1              |
| TSA244264        | Trimmatostroma   | salicis        |      |       |    |   |   |   |   |   |   |   |   |   |   |   |   |    | 460                 | 1              |
| AY329595         | Trogia           | sp             |      |       |    |   |   |   |   |   |   |   |   |   |   |   |   |    | 460                 | 1              |
| TME459582        | Tuber            | melanosporum   |      |       |    |   |   |   |   |   |   |   |   |   |   |   |   |    | 460                 | 1              |
| AY456371         | Tylophilus       | sp             |      |       |    |   |   |   |   |   |   |   |   |   |   |   |   |    | 460                 | 1              |
| AF485077         | Urnula           | helvelloides   |      |       |    |   |   |   |   |   |   |   |   |   |   |   |   |    | 460                 | 1              |
| XAR419221        | Xerocomus        | armeniacus     |      |       |    |   |   |   |   |   |   |   |   |   |   |   |   |    | 460                 | 1              |
| XCH419223        | Xerocomus        | chrysenteron   |      |       |    |   |   |   |   |   |   |   |   |   |   |   |   |    | 460                 | 1              |
| AF402140         | Xerocomus        | pruinatus      |      |       |    |   |   |   |   |   |   |   |   |   |   |   |   |    | 460                 | 1              |
| CGE510274        | Cenococcum       | geophilum      |      |       |    |   |   |   |   |   |   |   |   |   |   |   | - |    | 22                  | 2              |
| AF297229         | Cercospora       | asparagi       |      |       |    |   |   |   |   |   |   |   |   |   |   |   | - |    | 22                  | 2              |
| AF297222         | Cercospora       | beticola       |      |       |    |   |   |   |   |   |   |   |   |   |   |   | - |    | 22                  | 2              |
| AF297226         | Cercospora       | kalmiae        |      |       |    |   |   |   |   |   |   |   |   |   |   |   | - |    | 22                  | 2              |
| AY633838         | Cercospora       | kikuchii       |      |       |    |   |   |   |   |   |   |   |   |   |   |   | - |    | 22                  | 2              |
| AF297230         | Cercospora       | nicotianae     |      |       |    |   |   |   |   |   |   |   |   |   |   |   | - |    | 22                  | 2              |
| AF297232         | Cercospora       | sorghii        |      |       |    |   |   |   |   |   |   |   |   |   |   |   | - |    | 22                  | 2              |
| GLA301970        | Glomerella       | lagenaria      |      |       |    |   |   |   |   |   |   |   |   |   |   |   | - |    | 22                  | 2              |
| AF297236         | Mycosphaerella   | brassicicola   |      |       |    |   |   |   |   |   |   |   |   |   |   |   | - |    | 22                  | 2              |
| AY266153         | Mycosphaerella   | cruenta        |      |       |    |   |   |   |   |   |   |   |   |   |   |   | - |    | 22                  | 2              |
| AF181705         | Mycosphaerella   | fijiensis      |      |       |    |   |   |   |   |   |   |   |   |   |   |   | - |    | 22                  | 2              |
| AF309603         | Mycosphaerella   | flexuosa       |      |       |    |   |   |   |   |   |   |   |   |   |   |   | - |    | 22                  | 2              |
| AF468881         | Mycosphaerella   | juvenis        |      |       |    |   |   |   |   |   |   |   |   |   |   |   | - |    | 22                  | 2              |
| AY152570         | Mycosphaerella   | linicola       |      |       |    |   |   |   |   |   |   |   |   |   |   |   | - |    | 22                  | 2              |
| AY725575         | Mycosphaerella   | ohnowa         |      |       |    |   |   |   |   |   |   |   |   |   |   |   | - |    | 22                  | 2              |
| AF079776         | Phomopsis        | amaranthicola  |      |       |    |   |   |   |   |   |   |   |   |   |   |   | - |    | 22                  | 2              |
| AF309596         | Pseudocercospora | paraguayen     |      |       |    |   |   |   |   |   |   |   |   |   |   |   | - |    | 22                  | 2              |
| AY259133         | Ramulispora      | sorghii        |      |       |    |   |   |   |   |   |   |   |   |   |   |   | - |    | 22                  | 2              |
| AY152571         | Septoria         | aciculosa      |      |       |    |   |   |   |   |   |   |   |   |   |   |   | - |    | 22                  | 2              |
| AY152569         | Septoria         | gerberae       |      |       |    |   |   |   |   |   |   |   |   |   |   |   | - |    | 22                  | 2              |
| AY826767         | Septoria         | glycines       |      |       |    |   |   |   |   |   |   |   |   |   |   |   | - |    | 22                  | 2              |
| AY260082         | Septoria         | protearum      |      |       |    |   |   |   |   |   |   |   |   |   |   |   | - |    | 22                  | 2              |
| AY318746         | Pisolithus       | albus          |      |       |    |   |   |   |   |   |   |   |   |   |   |   | G |    | 2                   | 3              |
| AF270781         | Pisolithus       | sp             |      |       |    |   |   |   |   |   |   |   |   |   |   |   | G |    | 2                   | 3              |
| CFR486964        | Calvatia         | fragilis       |      |       |    | C |   |   |   |   |   |   |   |   |   |   |   |    | 1                   | 4              |
| AF058303         | Rhizopogon       | burlinghamii   |      |       |    |   |   | A |   |   |   |   |   |   |   |   |   |    | 1                   | 5              |
| AF096976         | Pisolithus       | arhizus        |      |       |    |   |   |   |   |   |   |   |   |   |   |   | A |    | 1                   | 6              |
| AF333489         | Phakopsora       | pachyrhizi     |      |       |    |   |   |   |   |   |   |   |   |   |   |   |   | A  | 1                   | 7              |
| AF097575         | Elsinoe          | leucospermi    |      |       |    |   |   |   |   |   |   |   |   |   |   |   | - |    | 1                   | 8              |
| AF241480         | Acer             | argutum        |      |       |    |   |   |   |   |   |   |   |   |   |   |   |   | T  | 75                  | 9              |
| AF241481         | Acer             | buergerianum   |      |       |    |   |   |   |   |   |   |   |   |   |   |   |   | T  | 75                  | 9              |
| AF406969         | Acer             | caesium        |      |       |    |   |   |   |   |   |   |   |   |   |   |   |   | T  | 75                  | 9              |
| AF401158         | Acer             | campestre      |      |       |    |   |   |   |   |   |   |   |   |   |   |   |   | T  | 75                  | 9              |
| AF401138         | Acer             | cappadocicum   |      |       |    |   |   |   |   |   |   |   |   |   |   |   |   | T  | 75                  | 9              |
| AF241482         | Acer             | carpinifolium  |      |       |    |   |   |   |   |   |   |   |   |   |   |   |   | T  | 75                  | 9              |
| AF241483         | Acer             | cissifolium    |      |       |    |   |   |   |   |   |   |   |   |   |   |   |   | T  | 75                  | 9              |
| AF401135         | Acer             | crassum        |      |       |    |   |   |   |   |   |   |   |   |   |   |   |   | T  | 75                  | 9              |
| AF020368         | Acer             | crataegifolium |      |       |    |   |   |   |   |   |   |   |   |   |   |   |   | T  | 75                  | 9              |
| AF401144         | Acer             | davidii        |      |       |    |   |   |   |   |   |   |   |   |   |   |   |   | T  | 75                  | 9              |
| AF241484         | Acer             | diabolicum     |      |       |    |   |   |   |   |   |   |   |   |   |   |   |   | T  | 75                  | 9              |
| AF020379         | Acer             | distylum       |      |       |    |   |   |   |   |   |   |   |   |   |   |   |   | T  | 75                  | 9              |
| AF241486         | Acer             | fabri          |      |       |    |   |   |   |   |   |   |   |   |   |   |   |   | T  | 75                  | 9              |
| AF241488         | Acer             | glabrum        |      |       |    |   |   |   |   |   |   |   |   |   |   |   |   | T  | 75                  | 9              |
| AF401141         | Acer             | henryi         |      |       |    |   |   |   |   |   |   |   |   |   |   |   |   | T  | 75                  | 9              |
| AF241489         | Acer             | japonicum      |      |       |    |   |   |   |   |   |   |   |   |   |   |   |   | T  | 75                  | 9              |
| AF401143         | Acer             | kungshanense   |      |       |    |   |   |   |   |   |   |   |   |   |   |   |   | T  | 75                  | 9              |
| AF241490         | Acer             | laurinum       |      |       |    |   |   |   |   |   |   |   |   |   |   |   |   | T  | 75                  | 9              |
| AF401156         | Acer             | macrophyllum   |      |       |    |   |   |   |   |   |   |   |   |   |   |   |   | T  | 75                  | 9              |
| AF401129         | Acer             | mandshuricum   |      |       |    |   |   |   |   |   |   |   |   |   |   |   |   | T  | 75                  | 9              |
| AF401124         | Acer             | miaoshanicum   |      |       |    |   |   |   |   |   |   |   |   |   |   |   |   | T  | 75                  | 9              |
| AF020369         | Acer             | micranthum     |      |       |    |   |   |   |   |   |   |   |   |   |   |   |   | T  | 75                  | 9              |
| AF241491         | Acer             | mono           |      |       |    |   |   |   |   |   |   |   |   |   |   |   |   | T  | 75                  | 9              |





| Accession Number | Genus           | Species          | 5.8S | 58A2R<br>58A1F | 3' | C | G | A | T | G | A | A | G | A | A | C | G | C | A | G | 3' | Species per cluster | Cluster number |
|------------------|-----------------|------------------|------|----------------|----|---|---|---|---|---|---|---|---|---|---|---|---|---|---|---|----|---------------------|----------------|
| AF087105         | Compsopogon     | coeruleus        |      |                |    |   |   |   |   |   |   |   |   |   |   |   |   |   |   |   |    | 68                  | 10             |
| AF154863         | Cosmarium       | fontrabiense     |      |                |    |   |   |   |   |   |   |   |   |   |   |   |   |   |   |   |    | 68                  | 10             |
| AF154856         | Cosmarium       | obtusatum        |      |                |    |   |   |   |   |   |   |   |   |   |   |   |   |   |   |   |    | 68                  | 10             |
| AF154862         | Cosmarium       | tumidum          |      |                |    |   |   |   |   |   |   |   |   |   |   |   |   |   |   |   |    | 68                  | 10             |
| AY548208         | Cynanchum       | auriculatum      |      |                |    |   |   |   |   |   |   |   |   |   |   |   |   |   |   |   |    | 68                  | 10             |
| AF033280         | Dysmorphococcus | globosus         |      |                |    |   |   |   |   |   |   |   |   |   |   |   |   |   |   |   |    | 68                  | 10             |
| U71248           | Elaeis          | oleifera         |      |                |    |   |   |   |   |   |   |   |   |   |   |   |   |   |   |   |    | 68                  | 10             |
| EIAJ211          | Enteromorpha    | intestinalis     |      |                |    |   |   |   |   |   |   |   |   |   |   |   |   |   |   |   |    | 68                  | 10             |
| FHRRNA           | Funaria         | hygrometrica     |      |                |    |   |   |   |   |   |   |   |   |   |   |   |   |   |   |   |    | 68                  | 10             |
| GPRRNAS          | G               | planctonica      |      |                |    |   |   |   |   |   |   |   |   |   |   |   |   |   |   |   |    | 68                  | 10             |
| AY497560         | Ganonema        | farinosum        |      |                |    |   |   |   |   |   |   |   |   |   |   |   |   |   |   |   |    | 68                  | 10             |
| AY497564         | Helminthocladia | australis        |      |                |    |   |   |   |   |   |   |   |   |   |   |   |   |   |   |   |    | 68                  | 10             |
| AY083659         | Heritiera       | littoralis       |      |                |    |   |   |   |   |   |   |   |   |   |   |   |   |   |   |   |    | 68                  | 10             |
| AY328172         | Hopea           | hainanensis      |      |                |    |   |   |   |   |   |   |   |   |   |   |   |   |   |   |   |    | 68                  | 10             |
| AF082342         | Laurencia       | perforata        |      |                |    |   |   |   |   |   |   |   |   |   |   |   |   |   |   |   |    | 68                  | 10             |
| AF082340         | Laurencia       | sp               |      |                |    |   |   |   |   |   |   |   |   |   |   |   |   |   |   |   |    | 68                  | 10             |
| AF082345         | Laurencia       | viridis          |      |                |    |   |   |   |   |   |   |   |   |   |   |   |   |   |   |   |    | 68                  | 10             |
| AY497565         | Liagora         | boergesenii      |      |                |    |   |   |   |   |   |   |   |   |   |   |   |   |   |   |   |    | 68                  | 10             |
| AY497567         | Liagora         | ceranoides       |      |                |    |   |   |   |   |   |   |   |   |   |   |   |   |   |   |   |    | 68                  | 10             |
| AY497568         | Liagora         | decussata        |      |                |    |   |   |   |   |   |   |   |   |   |   |   |   |   |   |   |    | 68                  | 10             |
| AY497570         | Liagora         | orientalis       |      |                |    |   |   |   |   |   |   |   |   |   |   |   |   |   |   |   |    | 68                  | 10             |
| AY497572         | Liagora         | segawae          |      |                |    |   |   |   |   |   |   |   |   |   |   |   |   |   |   |   |    | 68                  | 10             |
| AY497576         | Liagora         | valida           |      |                |    |   |   |   |   |   |   |   |   |   |   |   |   |   |   |   |    | 68                  | 10             |
| AF455748         | Lycium          | chinense         |      |                |    |   |   |   |   |   |   |   |   |   |   |   |   |   |   |   |    | 68                  | 10             |
| AY880681         | Lycium          | ruthenicum       |      |                |    |   |   |   |   |   |   |   |   |   |   |   |   |   |   |   |    | 68                  | 10             |
| MGRDNA           | M               | glaucescens      |      |                |    |   |   |   |   |   |   |   |   |   |   |   |   |   |   |   |    | 68                  | 10             |
| AF448792         | Marsilea        | quadrifolia      |      |                |    |   |   |   |   |   |   |   |   |   |   |   |   |   |   |   |    | 68                  | 10             |
| AF415173         | Monostroma      | angicava         |      |                |    |   |   |   |   |   |   |   |   |   |   |   |   |   |   |   |    | 68                  | 10             |
| AF415171         | Monostroma      | arcticum         |      |                |    |   |   |   |   |   |   |   |   |   |   |   |   |   |   |   |    | 68                  | 10             |
| AF428049         | Monostroma      | grevillei        |      |                |    |   |   |   |   |   |   |   |   |   |   |   |   |   |   |   |    | 68                  | 10             |
| AF163111         | Monostroma      | nitidum          |      |                |    |   |   |   |   |   |   |   |   |   |   |   |   |   |   |   |    | 68                  | 10             |
| PBRRNAS          | P               | basiliense       |      |                |    |   |   |   |   |   |   |   |   |   |   |   |   |   |   |   |    | 68                  | 10             |
| PPRRNAS          | P               | paucicellulare   |      |                |    |   |   |   |   |   |   |   |   |   |   |   |   |   |   |   |    | 68                  | 10             |
| PSRRNAS          | P               | sarcinoidea      |      |                |    |   |   |   |   |   |   |   |   |   |   |   |   |   |   |   |    | 68                  | 10             |
| AB162911         | Parachlorella   | kessleri         |      |                |    |   |   |   |   |   |   |   |   |   |   |   |   |   |   |   |    | 68                  | 10             |
| AY548209         | Pleuropterus    | multiflorus      |      |                |    |   |   |   |   |   |   |   |   |   |   |   |   |   |   |   |    | 68                  | 10             |
| AF033296         | Pyrobotrys      | stellata         |      |                |    |   |   |   |   |   |   |   |   |   |   |   |   |   |   |   |    | 68                  | 10             |
| AF452163         | Pythium         | ultimum          |      |                |    |   |   |   |   |   |   |   |   |   |   |   |   |   |   |   |    | 68                  | 10             |
| SSRRAA           | S               | similis          |      |                |    |   |   |   |   |   |   |   |   |   |   |   |   |   |   |   |    | 68                  | 10             |
| AF448791         | Salvinia        | natans           |      |                |    |   |   |   |   |   |   |   |   |   |   |   |   |   |   |   |    | 68                  | 10             |
| SAC249511        | Scenedesmus     | acuminatus       |      |                |    |   |   |   |   |   |   |   |   |   |   |   |   |   |   |   |    | 68                  | 10             |
| SAC249508        | Scenedesmus     | acutus           |      |                |    |   |   |   |   |   |   |   |   |   |   |   |   |   |   |   |    | 68                  | 10             |
| AY510467         | Scenedesmus     | bajacalifornicus |      |                |    |   |   |   |   |   |   |   |   |   |   |   |   |   |   |   |    | 68                  | 10             |
| AY510470         | Scenedesmus     | deserticola      |      |                |    |   |   |   |   |   |   |   |   |   |   |   |   |   |   |   |    | 68                  | 10             |
| AY510466         | Scenedesmus     | dissociatus      |      |                |    |   |   |   |   |   |   |   |   |   |   |   |   |   |   |   |    | 68                  | 10             |
| SNA249510        | Scenedesmus     | naegelii         |      |                |    |   |   |   |   |   |   |   |   |   |   |   |   |   |   |   |    | 68                  | 10             |
| SOB249505        | Scenedesmus     | obliquus         |      |                |    |   |   |   |   |   |   |   |   |   |   |   |   |   |   |   |    | 68                  | 10             |
| AY510465         | Scenedesmus     | rotundus         |      |                |    |   |   |   |   |   |   |   |   |   |   |   |   |   |   |   |    | 68                  | 10             |
| AF154855         | Staurastrum     | sp               |      |                |    |   |   |   |   |   |   |   |   |   |   |   |   |   |   |   |    | 68                  | 10             |
| UZRRNAS          | U               | zonata           |      |                |    |   |   |   |   |   |   |   |   |   |   |   |   |   |   |   |    | 68                  | 10             |
| AJ626846         | Uncultured      | Urospora         |      |                |    |   |   |   |   |   |   |   |   |   |   |   |   |   |   |   |    | 68                  | 10             |
| AY476821         | Urospora        | neglecta         |      |                |    |   |   |   |   |   |   |   |   |   |   |   |   |   |   |   |    | 68                  | 10             |
| AY476812         | Urospora        | sp               |      |                |    |   |   |   |   |   |   |   |   |   |   |   |   |   |   |   |    | 68                  | 10             |
| AY476814         | Urospora        | wormskioldii     |      |                |    |   |   |   |   |   |   |   |   |   |   |   |   |   |   |   |    | 68                  | 10             |
| AY328171         | Vatica          | mangachapoi      |      |                |    |   |   |   |   |   |   |   |   |   |   |   |   |   |   |   |    | 68                  | 10             |
| AY497577         | Yamadaella      | caenomyce        |      |                |    |   |   |   |   |   |   |   |   |   |   |   |   |   |   |   |    | 68                  | 10             |
| AF401149         | Acer            | decandrum        |      |                |    |   |   |   |   |   |   |   |   |   |   |   |   |   | T | C |    | 1                   | 11             |

| Accession Number | Genus         | Species        | 28S                                     |  |    |  | 3' end                                      |  |    |    | NLC2 |   |  |   | Species per cluster | Cluster number |    |
|------------------|---------------|----------------|-----------------------------------------|--|----|--|---------------------------------------------|--|----|----|------|---|--|---|---------------------|----------------|----|
|                  |               |                | NLB4                                    |  |    |  | NLC2                                        |  |    |    |      |   |  |   |                     |                |    |
|                  |               |                | G T C A T A G A G G G T G A G A A T C C |  |    |  | G A G T T G T T T G G G A A T G C A G C T C |  |    |    |      |   |  |   |                     |                |    |
| AF433107         | Aspergillus   | elegans        |                                         |  |    |  |                                             |  |    |    |      |   |  |   | 494                 | 1              |    |
| AF335451         | Boletus       | mirabilis      |                                         |  |    |  |                                             |  |    |    |      |   |  |   | 494                 | 1              |    |
| AY394919         | Cenococcum    | geophilum      |                                         |  |    |  |                                             |  |    |    |      |   |  |   | 494                 | 1              |    |
| AF325292         | Lactarius     | torminosus     |                                         |  |    |  |                                             |  |    |    |      |   |  |   | 494                 | 1              |    |
| SCRMM01          | Saccharomyces | cerevisiae     |                                         |  |    |  |                                             |  |    |    |      |   |  |   | 494                 | 1              |    |
| AF130379         | Fusarium      | dimerum        | C                                       |  |    |  |                                             |  | GC |    | A    |   |  | T | 76                  | 2              |    |
| AF049176         | Verticillium  | lecanii        | C                                       |  |    |  |                                             |  | GC |    | A    |   |  | T | 76                  | 2              |    |
| AY612800         | Boletus       | bicolor        |                                         |  | G  |  |                                             |  |    |    |      |   |  |   | 49                  | 3              |    |
| AF071536         | Suillus       | sinuspaulianus |                                         |  | G  |  |                                             |  |    |    |      |   |  |   | 49                  | 3              |    |
| AF275540         | Microascus    | giganteus      | C                                       |  | C  |  |                                             |  | GC |    | A    |   |  | T | 19                  | 4              |    |
| AY216676         | Aspergillus   | ustus          |                                         |  | G  |  |                                             |  |    |    |      |   |  |   | 20                  | 5              |    |
| AF042571         | Russula       | earlei         | A                                       |  |    |  |                                             |  |    |    |      |   |  |   | 11                  | 7              |    |
| AF042622         | Suillus       | luteus         |                                         |  | G  |  |                                             |  | C  |    |      |   |  |   | 7                   | 8              |    |
| AF506462         | Russula       | nauseosa       |                                         |  | C  |  |                                             |  |    |    |      |   |  |   | 7                   | 9              |    |
| AF291349         | Myxarium      | grilletii      | T                                       |  |    |  |                                             |  |    |    |      |   |  |   | 7                   | 10             |    |
| AB027371         | Cordyceps     | kanzashiana    | C                                       |  | C  |  |                                             |  | GC |    | G    | A |  | T | C                   | 4              | 11 |
| AF218549         | Russula       | silvicola      |                                         |  |    |  |                                             |  |    |    |      |   |  |   | 4                   | 12             |    |
| AY612804         | Boletus       | subvelutipes   |                                         |  | GC |  |                                             |  |    |    |      |   |  |   | 4                   | 13             |    |
| AF274100         | Pertusaria    | erythrella     |                                         |  | C  |  |                                             |  |    |    |      |   |  |   | 3                   | 15             |    |
| AF479200         | Abelia        | triflora       | C                                       |  | GG |  |                                             |  | GC |    | G    |   |  | C | 93                  | 62             |    |
| AF297535         | Cornus        | mas            | C                                       |  | GG |  |                                             |  | GC |    | G    |   |  | C | 93                  | 62             |    |
| AF479183         | Helianthus    | annuus         | C                                       |  | GG |  |                                             |  | GC |    | G    |   |  | C | 93                  | 62             |    |
| AY056503         | Thuja         | plicata        | C                                       |  | GG |  |                                             |  | GC |    | G    |   |  | C | 93                  | 62             |    |
| AF389239         | Aextoxicon    | punctatum      | C                                       |  | G  |  |                                             |  | GC |    | G    |   |  | C | 43                  | 63             |    |
| SA25SR           | Sinapis       | alba           | C                                       |  | G  |  |                                             |  | GC |    | G    |   |  | C | 43                  | 63             |    |
| AY056502         | Larix         | leptolepis     | C                                       |  | TG |  |                                             |  | C  | GC | G    |   |  | C | 9                   | 64             |    |
| AY189036         | Aralidium     | pinnatifidum   | C                                       |  | TG |  |                                             |  | GC |    | G    |   |  | C | 7                   | 65             |    |
| AAU90690         | Araucaria     | araucana       | C                                       |  | GG |  |                                             |  | GC |    | G    |   |  | A | C                   | 6              | 66 |
| AGU90683         | Abies         | grandis        | C                                       |  | TG |  |                                             |  | T  | GC | G    |   |  | C | 4                   | 67             |    |

| Accession Number | 28S                |                     | 3' end                 | NLB4 | 3' end                 | NLC2 | Species | Cluster number |
|------------------|--------------------|---------------------|------------------------|------|------------------------|------|---------|----------------|
|                  | Genus              | Species             | GTCATAGAGGGTGTGAGAATCC |      | GAGTTGTTTGGGAATGCAGCTC |      |         |                |
| ABI406527        | Abortiporus        | biennis             |                        |      |                        |      | 494     | 1              |
| AY039305         | Acanthobasidium    | phragmitis          |                        |      |                        |      | 494     | 1              |
| AY039333         | Acanthofungus      | rimosus             |                        |      |                        |      | 494     | 1              |
| AF506400         | Acanthophysellum   | lividocoer          |                        |      |                        |      | 494     | 1              |
| AY039327         | Acanthophysium     | bisporum            |                        |      |                        |      | 494     | 1              |
| AY039310         | Acanthophysium     | cerussatum          |                        |      |                        |      | 494     | 1              |
| AY039319         | Acanthophysium     | lividocaerul        |                        |      |                        |      | 494     | 1              |
| AY039322         | Acanthophysium     | weirii              |                        |      |                        |      | 494     | 1              |
| AY584643         | Acarosporina       | microspora          |                        |      |                        |      | 494     | 1              |
| AF261623         | Agaricales         | sp                  |                        |      |                        |      | 494     | 1              |
| AF367935         | Agrocybe           | firma               |                        |      |                        |      | 494     | 1              |
| AY646101         | Agrocybe           | praecox             |                        |      |                        |      | 494     | 1              |
| AY039331         | Aleurobotrys       | botryosus           |                        |      |                        |      | 494     | 1              |
| AF506403         | Aleurocystidiellum | subcruen            |                        |      |                        |      | 494     | 1              |
| AY039324         | Aleurodiscus       | abietis             |                        |      |                        |      | 494     | 1              |
| AF506399         | Aleurodiscus       | cerussatus          |                        |      |                        |      | 494     | 1              |
| AY039320         | Aleurodiscus       | lapponicus          |                        |      |                        |      | 494     | 1              |
| AY039321         | Aleurodiscus       | laurentianus        |                        |      |                        |      | 494     | 1              |
| AY039332         | Aleurodiscus       | mirabilis           |                        |      |                        |      | 494     | 1              |
| AY586625         | Amaurodon          | viridis             |                        |      |                        |      | 494     | 1              |
| AF518597         | Amphinema          | byssoides           |                        |      |                        |      | 494     | 1              |
| AY586628         | Amylocorticium     | subincarnatu        |                        |      |                        |      | 494     | 1              |
| AF518598         | Amylocystis        | lapponica           |                        |      |                        |      | 494     | 1              |
| AF506405         | Amylostereum       | areolatum           |                        |      |                        |      | 494     | 1              |
| AF518599         | Amylostereum       | chailletii          |                        |      |                        |      | 494     | 1              |
| AF506407         | Amylostereum       | laevigatum          |                        |      |                        |      | 494     | 1              |
| AF287844         | Antrodia           | carbonica           |                        |      |                        |      | 494     | 1              |
| AJ583430         | Antrodia           | xantha              |                        |      |                        |      | 494     | 1              |
| AF433074         | Aspergillus        | auricomus           |                        |      |                        |      | 494     | 1              |
| AA15508          | Aspergillus        | avenaceus           |                        |      |                        |      | 494     | 1              |
| AF433046         | Aspergillus        | bridgeri            |                        |      |                        |      | 494     | 1              |
| AB29823          | Aspergillus        | brunneo-uniseriatus |                        |      |                        |      | 494     | 1              |
| AD15491          | Aspergillus        | dimorphicus         |                        |      |                        |      | 494     | 1              |
| AF433107         | Aspergillus        | elegans             |                        |      |                        |      | 494     | 1              |
| AF15504          | Aspergillus        | flaschentraegeri    |                        |      |                        |      | 494     | 1              |
| AG15490          | Aspergillus        | gorakhpurensis      |                        |      |                        |      | 494     | 1              |
| AI15485          | Aspergillus        | itaconicus          |                        |      |                        |      | 494     | 1              |
| AF433120         | Aspergillus        | melleus             |                        |      |                        |      | 494     | 1              |
| AF433088         | Aspergillus        | ochraceus           |                        |      |                        |      | 494     | 1              |
| AF433084         | Aspergillus        | ostianus            |                        |      |                        |      | 494     | 1              |
| AF433104         | Aspergillus        | petrakii            |                        |      |                        |      | 494     | 1              |
| AP20822          | Aspergillus        | pulvinus            |                        |      |                        |      | 494     | 1              |
| AY338959         | Aspergillus        | sclerotiorum        |                        |      |                        |      | 494     | 1              |
| AF433121         | Aspergillus        | sulphureus          |                        |      |                        |      | 494     | 1              |
| AW15495          | Aspergillus        | wentii              |                        |      |                        |      | 494     | 1              |
| AY586631         | Asterodon          | ferruginosum        |                        |      |                        |      | 494     | 1              |
| AY293168         | Athelia            | epiphylla           |                        |      |                        |      | 494     | 1              |
| AY700189         | Aureoboletus       | thibetanus          |                        |      |                        |      | 494     | 1              |
| AF291289         | Auricularia        | auricula-judae      |                        |      |                        |      | 494     | 1              |
| AF291290         | Auricularia        | delicata            |                        |      |                        |      | 494     | 1              |
| AF291291         | Auricularia        | fuscossuccinea      |                        |      |                        |      | 494     | 1              |
| AF506492         | Auricularia        | mesenterica         |                        |      |                        |      | 494     | 1              |
| AF261554         | Auricularia        | polytricha          |                        |      |                        |      | 494     | 1              |
| AY634277         | Auricularia        | sp                  |                        |      |                        |      | 494     | 1              |
| AY612797         | Austroboletus      | betula              |                        |      |                        |      | 494     | 1              |
| AY612798         | Austroboletus      | mucosus             |                        |      |                        |      | 494     | 1              |
| AF291294         | Basidioidendron    | caesiocinere        |                        |      |                        |      | 494     | 1              |
| AF291297         | Basidioidendron    | grandinioides       |                        |      |                        |      | 494     | 1              |
| AY187277         | Basidiomycete      | sp                  |                        |      |                        |      | 494     | 1              |
| AB096738         | Bjerkandera        | adusta              |                        |      |                        |      | 494     | 1              |
| AY089741         | Bjerkandera        | adustus             |                        |      |                        |      | 494     | 1              |
| AY633927         | Bjerkandera        | sp                  |                        |      |                        |      | 494     | 1              |
| AF506376         | Boidinia           | furfuracea          |                        |      |                        |      | 494     | 1              |
| AF506379         | Boidinia           | propinqua           |                        |      |                        |      | 494     | 1              |
| AF506378         | Boidinia           | sp                  |                        |      |                        |      | 494     | 1              |
| AF050642         | Boletellus         | betula              |                        |      |                        |      | 494     | 1              |
| AF050652         | Boletellus         | mirabilis           |                        |      |                        |      | 494     | 1              |
| AY684158         | Boletellus         | projectellus        |                        |      |                        |      | 494     | 1              |
| AF139684         | Boletus            | eximius             |                        |      |                        |      | 494     | 1              |
| AF456834         | Boletus            | griseus             |                        |      |                        |      | 494     | 1              |
| AF335451         | Boletus            | mirabilis           |                        |      |                        |      | 494     | 1              |
| AF456811         | Boletus            | retipes             |                        |      |                        |      | 494     | 1              |
| AF287849         | Bondarzewia        | berkeleyi           |                        |      |                        |      | 494     | 1              |
| AF393048         | Botryobasidium     | subcoronatum        |                        |      |                        |      | 494     | 1              |
| AY004336         | Botryosphaeria     | ribis               |                        |      |                        |      | 494     | 1              |
| AY586640         | Byssomerulius      | corium              |                        |      |                        |      | 494     | 1              |
| BSP406534        | Byssomerulius      | sp                  |                        |      |                        |      | 494     | 1              |
| AF279885         | Caloplaca          | cerina              |                        |      |                        |      | 494     | 1              |
| AY394919         | Cenococcum         | geophilum           |                        |      |                        |      | 494     | 1              |

| Accession Number | 28S Genus       | Species         | 3' end NLB4          |  | 3' end NLC2            |  | Species per cluster | Cluster number |
|------------------|-----------------|-----------------|----------------------|--|------------------------|--|---------------------|----------------|
|                  |                 |                 | GTCATAGAGGGTGAGAATCC |  | GAGTTGTTTGGGAATGCAGCTC |  |                     |                |
| AF518606         | Ceraceomyces    | serpens         |                      |  |                        |  | 494                 | 1              |
| AF393049         | Ceriporia       | viridans        |                      |  |                        |  | 494                 | 1              |
| CC15507          | Chaetosartorya  | chrysell        |                      |  |                        |  | 494                 | 1              |
| CC15505          | Chaetosartorya  | cremea          |                      |  |                        |  | 494                 | 1              |
| CS15512          | Chaetosartorya  | stromatoides    |                      |  |                        |  | 494                 | 1              |
| AB075359         | Chromocleista   | cinnabarina     |                      |  |                        |  | 494                 | 1              |
| AY684165         | Climacodon      | septentrionalis |                      |  |                        |  | 494                 | 1              |
| AY647208         | Clitocybe       | subvelosa       |                      |  |                        |  | 494                 | 1              |
| AF506382         | Conferticium    | ravum           |                      |  |                        |  | 494                 | 1              |
| AY586649         | Coniophora      | arida           |                      |  |                        |  | 494                 | 1              |
| AJ583426         | Coniophora      | puteana         |                      |  |                        |  | 494                 | 1              |
| CMI406565        | Coprinus        | micaceus        |                      |  |                        |  | 494                 | 1              |
| AY219581         | Cortinarius     | abnormis        |                      |  |                        |  | 494                 | 1              |
| AY033127         | Cortinarius     | alboroseus      |                      |  |                        |  | 494                 | 1              |
| AY174807         | Cortinarius     | anserinus       |                      |  |                        |  | 494                 | 1              |
| AF539730         | Cortinarius     | austroturmalis  |                      |  |                        |  | 494                 | 1              |
| AF388786         | Cortinarius     | badiovinaceus   |                      |  |                        |  | 494                 | 1              |
| AY174861         | Cortinarius     | boudieri        |                      |  |                        |  | 494                 | 1              |
| AF539715         | Cortinarius     | caelicolor      |                      |  |                        |  | 494                 | 1              |
| AF539711         | Cortinarius     | cervinus        |                      |  |                        |  | 494                 | 1              |
| AF388761         | Cortinarius     | cinereobrunneus |                      |  |                        |  | 494                 | 1              |
| AY174812         | Cortinarius     | cumatilis       |                      |  |                        |  | 494                 | 1              |
| AF539725         | Cortinarius     | elaphinus       |                      |  |                        |  | 494                 | 1              |
| AF539716         | Cortinarius     | flammuloides    |                      |  |                        |  | 494                 | 1              |
| AY174787         | Cortinarius     | glaucopus       |                      |  |                        |  | 494                 | 1              |
| AF388775         | Cortinarius     | globuliformis   |                      |  |                        |  | 494                 | 1              |
| AF539720         | Cortinarius     | icterinus       |                      |  |                        |  | 494                 | 1              |
| AY174846         | Cortinarius     | multiformis     |                      |  |                        |  | 494                 | 1              |
| AF539733         | Cortinarius     | myxoclaricolor  |                      |  |                        |  | 494                 | 1              |
| AF539727         | Cortinarius     | pachynemeus     |                      |  |                        |  | 494                 | 1              |
| AY174854         | Cortinarius     | porphyropus     |                      |  |                        |  | 494                 | 1              |
| AY174858         | Cortinarius     | purpurascens    |                      |  |                        |  | 494                 | 1              |
| AY174800         | Cortinarius     | saginus         |                      |  |                        |  | 494                 | 1              |
| AF539729         | Cortinarius     | squamiger       |                      |  |                        |  | 494                 | 1              |
| AF539717         | Cortinarius     | viridibasalis   |                      |  |                        |  | 494                 | 1              |
| AY174789         | Cortinarius     | viridocoeruleus |                      |  |                        |  | 494                 | 1              |
| AF393050         | Cryptoporus     | volvatus        |                      |  |                        |  | 494                 | 1              |
| AY293616         | Cyrtarophyllum  | besseyi         |                      |  |                        |  | 494                 | 1              |
| AY293176         | Dacryobolus     | sudans          |                      |  |                        |  | 494                 | 1              |
| AF291313         | Daedalea        | quercina        |                      |  |                        |  | 494                 | 1              |
| DMO406548        | Datronia        | mollis          |                      |  |                        |  | 494                 | 1              |
| DSQ487514        | Dichomitus      | squalens        |                      |  |                        |  | 494                 | 1              |
| AF506428         | Dichostereum    | aff             |                      |  |                        |  | 494                 | 1              |
| AF506391         | Dichostereum    | granulosum      |                      |  |                        |  | 494                 | 1              |
| AF506392         | Dichostereum    | pallescens      |                      |  |                        |  | 494                 | 1              |
| AJ583428         | Donkioporia     | expansa         |                      |  |                        |  | 494                 | 1              |
| AF506430         | Echinodontium   | tinctorium      |                      |  |                        |  | 494                 | 1              |
| AF476997         | Ectomycorrhizal | root            |                      |  |                        |  | 494                 | 1              |
| AF291318         | Eichleriella    | deglubens       |                      |  |                        |  | 494                 | 1              |
| AY586653         | Elmerina        | holophaea       |                      |  |                        |  | 494                 | 1              |
| AY505543         | Endoperplexa    | enodulosa       |                      |  |                        |  | 494                 | 1              |
| AF033435         | Eupenicillium   | brefeldianum    |                      |  |                        |  | 494                 | 1              |
| AY213698         | Eupenicillium   | cinnamopurpur   |                      |  |                        |  | 494                 | 1              |
| AF033462         | Eupenicillium   | rubidurum       |                      |  |                        |  | 494                 | 1              |
| AY243524         | Exidia          | crenata         |                      |  |                        |  | 494                 | 1              |
| AF506493         | Exidia          | glandulosa      |                      |  |                        |  | 494                 | 1              |
| AF291320         | Exidia          | japonica        |                      |  |                        |  | 494                 | 1              |
| AF291321         | Exidia          | pithya          |                      |  |                        |  | 494                 | 1              |
| AF347112         | Exidia          | recisa          |                      |  |                        |  | 494                 | 1              |
| AF291323         | Exidia          | saccharina      |                      |  |                        |  | 494                 | 1              |
| AY700191         | Exidia          | sp              |                      |  |                        |  | 494                 | 1              |
| AF291325         | Exidia          | truncata        |                      |  |                        |  | 494                 | 1              |
| AY645056         | Exidia          | uvapsassa       |                      |  |                        |  | 494                 | 1              |
| AY586654         | Exidiopsis      | calcea          |                      |  |                        |  | 494                 | 1              |
| AF291328         | Exidiopsis      | grisea          |                      |  |                        |  | 494                 | 1              |
| AF395309         | Exidiopsis      | plumbescens     |                      |  |                        |  | 494                 | 1              |
| FRU406475        | Fibricium       | rude            |                      |  |                        |  | 494                 | 1              |
| AF195588         | Flammula        | alnicola        |                      |  |                        |  | 494                 | 1              |
| AY380408         | Flammulaster    | sp              |                      |  |                        |  | 494                 | 1              |
| AF291331         | Fomes           | fomentarius     |                      |  |                        |  | 494                 | 1              |
| AF311048         | Fomitopsis      | pinicola        |                      |  |                        |  | 494                 | 1              |
| AY618209         | Fuscoporia      | palmicola       |                      |  |                        |  | 494                 | 1              |
| GBRS25S          | G               | boninense       |                      |  |                        |  | 494                 | 1              |
| GLRZ25S          | G               | lucidum         |                      |  |                        |  | 494                 | 1              |
| GM25S9           | G               | microsporium    |                      |  |                        |  | 494                 | 1              |
| GTJ225S          | G               | tsugae          |                      |  |                        |  | 494                 | 1              |
| AF195590         | Galerina        | marginata       |                      |  |                        |  | 494                 | 1              |
| AF261653         | Galerina        | paludosa        |                      |  |                        |  | 494                 | 1              |
| AF287859         | Geastrum        | saccatum        |                      |  |                        |  | 494                 | 1              |

| Accession Number | 28S                |                 | 3' end                                  | NLB4 | 3' end                                      | NLC2 | Species per cluster | Cluster number |
|------------------|--------------------|-----------------|-----------------------------------------|------|---------------------------------------------|------|---------------------|----------------|
|                  | Genus              | Species         | G T C A T A G A G G G T G A G A A T C C |      | G A G T T G T T T G G G A A T G C A G C T C |      |                     |                |
| AF141612         | Gelatoporia        | pannocincta     |                                         |      |                                             |      | 494                 | 1              |
| AF033389         | Geosmithia         | argillacea      |                                         |      |                                             |      | 494                 | 1              |
| AF033386         | Geosmithia         | cylindrospora   |                                         |      |                                             |      | 494                 | 1              |
| AF033387         | Geosmithia         | emersonii       |                                         |      |                                             |      | 494                 | 1              |
| AB047228         | Geosmithia         | viridis         |                                         |      |                                             |      | 494                 | 1              |
| U66434           | Gerronema          | subclavatum     |                                         |      |                                             |      | 494                 | 1              |
| AF506433         | Gloeocystidiellum  | aculeatum       |                                         |      |                                             |      | 494                 | 1              |
| AF506432         | Gloeocystidiellum  | aspellum        |                                         |      |                                             |      | 494                 | 1              |
| AF506434         | Gloeocystidiellum  | compactum       |                                         |      |                                             |      | 494                 | 1              |
| AF506439         | Gloeocystidiellum  | formosanu       |                                         |      |                                             |      | 494                 | 1              |
| AF506381         | Gloeocystidiellum  | heimii          |                                         |      |                                             |      | 494                 | 1              |
| AF287860         | Gloeocystidiellum  | leucoxant       |                                         |      |                                             |      | 494                 | 1              |
| AF506421         | Gloeocystidiellum  | luridum         |                                         |      |                                             |      | 494                 | 1              |
| AF310090         | Gloeocystidiellum  | sp              |                                         |      |                                             |      | 494                 | 1              |
| AF506404         | Gloeocystidiellum  | subasperi       |                                         |      |                                             |      | 494                 | 1              |
| AF506442         | Gloeocystidiellum  | triste          |                                         |      |                                             |      | 494                 | 1              |
| AF506443         | Gloeocystidiellum  | wakullum        |                                         |      |                                             |      | 494                 | 1              |
| AF506438         | Gloeocystidiopsis  | aff             |                                         |      |                                             |      | 494                 | 1              |
| AF506437         | Gloeocystidiopsis  | flammea         |                                         |      |                                             |      | 494                 | 1              |
| AF506445         | Gloeodontia        | discolor        |                                         |      |                                             |      | 494                 | 1              |
| AF506448         | Gloeomyces         | graminicola     |                                         |      |                                             |      | 494                 | 1              |
| AF506436         | Gloeopeniophorella | aff             |                                         |      |                                             |      | 494                 | 1              |
| AF506435         | Gloeopeniophorella | convolve        |                                         |      |                                             |      | 494                 | 1              |
| AF506440         | Gloeopeniophorella | laxa            |                                         |      |                                             |      | 494                 | 1              |
| AY586656         | Gloeoporus         | taxicola        |                                         |      |                                             |      | 494                 | 1              |
| AF506450         | Gloiodon           | nigrescens      |                                         |      |                                             |      | 494                 | 1              |
| AY640951         | Glypholecia        | scabra          |                                         |      |                                             |      | 494                 | 1              |
| AY647207         | Gomphus            | clavatus        |                                         |      |                                             |      | 494                 | 1              |
| GFU406506        | Grammothele        | fuligo          |                                         |      |                                             |      | 494                 | 1              |
| AF287863         | Grifola            | frondosa        |                                         |      |                                             |      | 494                 | 1              |
| AF265538         | Gymnomyces         | pallidus        |                                         |      |                                             |      | 494                 | 1              |
| HC11918          | Hebeloma           | crustuliniforme |                                         |      |                                             |      | 494                 | 1              |
| AY033139         | Hebeloma           | fastibile       |                                         |      |                                             |      | 494                 | 1              |
| AF430291         | Hebeloma           | incarnatum      |                                         |      |                                             |      | 494                 | 1              |
| AF261515         | Hebeloma           | longicaudum     |                                         |      |                                             |      | 494                 | 1              |
| AY038310         | Hebeloma           | olympianum      |                                         |      |                                             |      | 494                 | 1              |
| AY219607         | Hebeloma           | sp              |                                         |      |                                             |      | 494                 | 1              |
| AY745703         | Hebeloma           | velutipes       |                                         |      |                                             |      | 494                 | 1              |
| AF261647         | Hemipholiota       | destruens       |                                         |      |                                             |      | 494                 | 1              |
| AF261646         | Hemipholiota       | lucifera        |                                         |      |                                             |      | 494                 | 1              |
| AF195593         | Hemipholiota       | populnea        |                                         |      |                                             |      | 494                 | 1              |
| AF347096         | Heterobasidion     | annosum         |                                         |      |                                             |      | 494                 | 1              |
| AF291334         | Heterochaete       | hirneoloides    |                                         |      |                                             |      | 494                 | 1              |
| AF291335         | Heterochaete       | shearii         |                                         |      |                                             |      | 494                 | 1              |
| AF291336         | Heterochaete       | sp              |                                         |      |                                             |      | 494                 | 1              |
| AY509552         | Heterochaetella    | brachyspora     |                                         |      |                                             |      | 494                 | 1              |
| HHY487625        | Hexagonia          | hydnoides       |                                         |      |                                             |      | 494                 | 1              |
| AF139956         | Hohenbuehelia      | petalodes       |                                         |      |                                             |      | 494                 | 1              |
| AF042601         | Hohenbuehelia      | sp              |                                         |      |                                             |      | 494                 | 1              |
| AF135171         | Hohenbuehelia      | tristis         |                                         |      |                                             |      | 494                 | 1              |
| AY684156         | Hygrophoropsis     | aurantiaca      |                                         |      |                                             |      | 494                 | 1              |
| HJE406452        | Hyphodontia        | barbajovis      |                                         |      |                                             |      | 494                 | 1              |
| AY646100         | Hyphodontia        | gossypina       |                                         |      |                                             |      | 494                 | 1              |
| AF195595         | Hypholoma          | capnoides       |                                         |      |                                             |      | 494                 | 1              |
| AF261628         | Hypholoma          | ericaeum        |                                         |      |                                             |      | 494                 | 1              |
| AF261630         | Hypholoma          | fasciculare     |                                         |      |                                             |      | 494                 | 1              |
| AY635774         | Hypholoma          | sublateritium   |                                         |      |                                             |      | 494                 | 1              |
| AF261631         | Hypholoma          | subviride       |                                         |      |                                             |      | 494                 | 1              |
| AF261627         | Hypholoma          | udum            |                                         |      |                                             |      | 494                 | 1              |
| HEI406508        | Hypochnicium       | eichleri        |                                         |      |                                             |      | 494                 | 1              |
| AY293189         | Hypsizygus         | tessulatus      |                                         |      |                                             |      | 494                 | 1              |
| AY059032         | Inonotus           | glomeratus      |                                         |      |                                             |      | 494                 | 1              |
| AF291341         | Inonotus           | nodulosus       |                                         |      |                                             |      | 494                 | 1              |
| AF311017         | Inonotus           | obliquus        |                                         |      |                                             |      | 494                 | 1              |
| AY059040         | Inonotus           | weirii          |                                         |      |                                             |      | 494                 | 1              |
| IBE406543        | Ischnoderma        | benzoinum       |                                         |      |                                             |      | 494                 | 1              |
| IRE487927        | Ischnoderma        | resinosum       |                                         |      |                                             |      | 494                 | 1              |
| AF518625         | Junghuhnia         | subundata       |                                         |      |                                             |      | 494                 | 1              |
| AY582127         | Kazachstania       | aerobia         |                                         |      |                                             |      | 494                 | 1              |
| AF398482         | Kazachstania       | viticola        |                                         |      |                                             |      | 494                 | 1              |
| AY048159         | Kluyveromyces      | africanus       |                                         |      |                                             |      | 494                 | 1              |
| AY048170         | Kluyveromyces      | yarrowii        |                                         |      |                                             |      | 494                 | 1              |
| AF291342         | Kuehneromyces      | mutabilis       |                                         |      |                                             |      | 494                 | 1              |
| AF325268         | Lactarius          | badiosanguineus |                                         |      |                                             |      | 494                 | 1              |
| AF325269         | Lactarius          | blennius        |                                         |      |                                             |      | 494                 | 1              |
| AF325270         | Lactarius          | camphoratus     |                                         |      |                                             |      | 494                 | 1              |
| AF325271         | Lactarius          | circellatus     |                                         |      |                                             |      | 494                 | 1              |
| LC11919          | Lactarius          | corrugis        |                                         |      |                                             |      | 494                 | 1              |
| AY631899         | Lactarius          | deceptivus      |                                         |      |                                             |      | 494                 | 1              |

| Accession Number | 28S             |                  | 3' end               | NLB4 | 3' end                 | NLC2 | Species per cluster | Cluster number |
|------------------|-----------------|------------------|----------------------|------|------------------------|------|---------------------|----------------|
|                  | Genus           | Species          | GTCATAGAGGGTGAGAATCC |      | GAGTTGTTTGGGAATGCAGCTC |      |                     |                |
| AF325274         | Lactarius       | helvus           |                      |      |                        |      | 494                 | 1              |
| AF506411         | Lactarius       | leonis           |                      |      |                        |      | 494                 | 1              |
| AF325275         | Lactarius       | lignyotus        |                      |      |                        |      | 494                 | 1              |
| AF325276         | Lactarius       | lilacinus        |                      |      |                        |      | 494                 | 1              |
| AF325277         | Lactarius       | necator          |                      |      |                        |      | 494                 | 1              |
| AF325278         | Lactarius       | pallidus         |                      |      |                        |      | 494                 | 1              |
| AF218554         | Lactarius       | peckii           |                      |      |                        |      | 494                 | 1              |
| AF325279         | Lactarius       | piperatus        |                      |      |                        |      | 494                 | 1              |
| AF325280         | Lactarius       | pominsis         |                      |      |                        |      | 494                 | 1              |
| AY228358         | Lactarius       | pseudomucidus    |                      |      |                        |      | 494                 | 1              |
| AF325281         | Lactarius       | pubescens        |                      |      |                        |      | 494                 | 1              |
| AF325282         | Lactarius       | quieticolor      |                      |      |                        |      | 494                 | 1              |
| AF325284         | Lactarius       | salmonicolor     |                      |      |                        |      | 494                 | 1              |
| AF325285         | Lactarius       | scrobiculatus    |                      |      |                        |      | 494                 | 1              |
| AF325286         | Lactarius       | sp               |                      |      |                        |      | 494                 | 1              |
| AF218555         | Lactarius       | speciosus        |                      |      |                        |      | 494                 | 1              |
| AF325287         | Lactarius       | sphagneti        |                      |      |                        |      | 494                 | 1              |
| AF325288         | Lactarius       | spinosulus       |                      |      |                        |      | 494                 | 1              |
| AF325289         | Lactarius       | subdulcis        |                      |      |                        |      | 494                 | 1              |
| AF506412         | Lactarius       | subbemboratus    |                      |      |                        |      | 494                 | 1              |
| AF218553         | Lactarius       | subpurpureus     |                      |      |                        |      | 494                 | 1              |
| AF325290         | Lactarius       | subsericatus     |                      |      |                        |      | 494                 | 1              |
| AF325291         | Lactarius       | tabidus          |                      |      |                        |      | 494                 | 1              |
| AF325292         | Lactarius       | torminosus       |                      |      |                        |      | 494                 | 1              |
| AF325293         | Lactarius       | uvidus           |                      |      |                        |      | 494                 | 1              |
| AF325294         | Lactarius       | vellereus        |                      |      |                        |      | 494                 | 1              |
| AF310102         | Laxitextum      | bicolor          |                      |      |                        |      | 494                 | 1              |
| AF261563         | Lentinus        | squarrosulus     |                      |      |                        |      | 494                 | 1              |
| AF518627         | Lentinus        | tigrinus         |                      |      |                        |      | 494                 | 1              |
| LBE487931        | Lenzites        | betulina         |                      |      |                        |      | 494                 | 1              |
| AF482897         | Lepiota         | rufipes          |                      |      |                        |      | 494                 | 1              |
| AY586686         | Leucogyrophana  | romellii         |                      |      |                        |      | 494                 | 1              |
| AF518629         | Lindtneria      | trachyspora      |                      |      |                        |      | 494                 | 1              |
| AF506441         | Megalocystidium | chelidonium      |                      |      |                        |      | 494                 | 1              |
| AF506420         | Megalocystidium | leucoxanthu      |                      |      |                        |      | 494                 | 1              |
| AF506422         | Megalocystidium | luridum          |                      |      |                        |      | 494                 | 1              |
| AY176456         | Melanophyllum   | haematospermu    |                      |      |                        |      | 494                 | 1              |
| MG1487930        | Meripilus       | giganteus        |                      |      |                        |      | 494                 | 1              |
| AF042637         | Mycena          | clavicularis     |                      |      |                        |      | 494                 | 1              |
| AF261522         | Naucoria        | bohemica         |                      |      |                        |      | 494                 | 1              |
| AF261517         | Naucoria        | escharioides     |                      |      |                        |      | 494                 | 1              |
| AY380405         | Naucoria        | escharoides      |                      |      |                        |      | 494                 | 1              |
| AY261170         | Nematoctonus    | sp               |                      |      |                        |      | 494                 | 1              |
| U66451           | Omphalina       | rivulicola       |                      |      |                        |      | 494                 | 1              |
| AF311023         | Onnia           | tomentosa        |                      |      |                        |      | 494                 | 1              |
| AF287877         | Oxyporus        | sp               |                      |      |                        |      | 494                 | 1              |
| AF261513         | Pachylepyrium   | funariophilum    |                      |      |                        |      | 494                 | 1              |
| AB047229         | Paecilomyces    | pascua           |                      |      |                        |      | 494                 | 1              |
| AY014287         | Panellus        | serotinus        |                      |      |                        |      | 494                 | 1              |
| AF287878         | Panus           | rudis            |                      |      |                        |      | 494                 | 1              |
| AF518635         | Parmastomyces   | transmutans      |                      |      |                        |      | 494                 | 1              |
| AF033397         | Penicillium     | aculeatum        |                      |      |                        |      | 494                 | 1              |
| AB047230         | Penicillium     | oblatum          |                      |      |                        |      | 494                 | 1              |
| AF033398         | Penicillium     | resedanum        |                      |      |                        |      | 494                 | 1              |
| AB047231         | Penicillium     | sabulosum        |                      |      |                        |      | 494                 | 1              |
| AF033488         | Penicillium     | soppii           |                      |      |                        |      | 494                 | 1              |
| AF481123         | Penicillium     | sp               |                      |      |                        |      | 494                 | 1              |
| AF506424         | Peniophora      | cinerea          |                      |      |                        |      | 494                 | 1              |
| AF506425         | Peniophora      | incarnata        |                      |      |                        |      | 494                 | 1              |
| PSP406568        | Peniophora      | sp               |                      |      |                        |      | 494                 | 1              |
| AF329176         | Pertusaria      | albescens        |                      |      |                        |      | 494                 | 1              |
| AF261505         | Phaeocollybia   | dissiliens       |                      |      |                        |      | 494                 | 1              |
| AF261506         | Phaeocollybia   | jennyae          |                      |      |                        |      | 494                 | 1              |
| AF261474         | Phaeolepiota    | aurea            |                      |      |                        |      | 494                 | 1              |
| AF195599         | Phaeonematoloma | myosotis         |                      |      |                        |      | 494                 | 1              |
| AF287883         | Phanerochaete   | chryso sporium   |                      |      |                        |      | 494                 | 1              |
| PSO406532        | Phanerochaete   | sordida          |                      |      |                        |      | 494                 | 1              |
| AY059029         | Phellinus       | cancriformans    |                      |      |                        |      | 494                 | 1              |
| AF311026         | Phellinus       | chrysoloma       |                      |      |                        |      | 494                 | 1              |
| AF311031         | Phellinus       | ferrugineofuscus |                      |      |                        |      | 494                 | 1              |
| AY059020         | Phellinus       | pachyphloeus     |                      |      |                        |      | 494                 | 1              |
| AF311037         | Phellinus       | pini             |                      |      |                        |      | 494                 | 1              |
| AY059016         | Phellinus       | sulphurascens    |                      |      |                        |      | 494                 | 1              |
| AF311044         | Phellinus       | viticola         |                      |      |                        |      | 494                 | 1              |
| AF141616         | Phlebia         | albida           |                      |      |                        |      | 494                 | 1              |
| AF141629         | Phlebia         | serialis         |                      |      |                        |      | 494                 | 1              |
| AF141634         | Phlebiopsis     | gigantea         |                      |      |                        |      | 494                 | 1              |
| AF195603         | Pholiota        | aurivella        |                      |      |                        |      | 494                 | 1              |
| AF195606         | Pholiota        | conissans        |                      |      |                        |      | 494                 | 1              |





| Accession Number | 28S              |                | 3' end NLB4                             |  | 3' end NLC2                                 |  | Species per cluster | Cluster number |
|------------------|------------------|----------------|-----------------------------------------|--|---------------------------------------------|--|---------------------|----------------|
|                  | Genus            | Species        | G T C A T A G A G G G T G A G A A T C C |  | G A G T T G T T T G G G A A T G C A G C T C |  |                     |                |
| AF325312         | Russula          | nigricans      |                                         |  |                                             |  | 494                 | 1              |
| AY228349         | Russula          | occidentalis   |                                         |  |                                             |  | 494                 | 1              |
| AF506463         | Russula          | persicina      |                                         |  |                                             |  | 494                 | 1              |
| AF325315         | Russula          | puellaris      |                                         |  |                                             |  | 494                 | 1              |
| AF325317         | Russula          | raoultii       |                                         |  |                                             |  | 494                 | 1              |
| AF325318         | Russula          | sardonina      |                                         |  |                                             |  | 494                 | 1              |
| AF325319         | Russula          | solaris        |                                         |  |                                             |  | 494                 | 1              |
| AF506464         | Russula          | sphagnophila   |                                         |  |                                             |  | 494                 | 1              |
| AF325320         | Russula          | vesca          |                                         |  |                                             |  | 494                 | 1              |
| AF325321         | Russula          | veternosa      |                                         |  |                                             |  | 494                 | 1              |
| AF506465         | Russula          | violacea       |                                         |  |                                             |  | 494                 | 1              |
| AF218542         | Russula          | xerampelina    |                                         |  |                                             |  | 494                 | 1              |
| AY048164         | Saccharomyces    | barnettii      |                                         |  |                                             |  | 494                 | 1              |
| AY130339         | Saccharomyces    | bayanus        |                                         |  |                                             |  | 494                 | 1              |
| AF398478         | Saccharomyces    | cariocanus     |                                         |  |                                             |  | 494                 | 1              |
| SCRRM01          | Saccharomyces    | cerevisiae     |                                         |  |                                             |  | 494                 | 1              |
| AF005707         | Saccharomyces    | chevalieri     |                                         |  |                                             |  | 494                 | 1              |
| AY048168         | Saccharomyces    | dairenensis    |                                         |  |                                             |  | 494                 | 1              |
| AF005708         | Saccharomyces    | ellipsoideus   |                                         |  |                                             |  | 494                 | 1              |
| CHO508565        | Saccharomyces    | exiguus        |                                         |  |                                             |  | 494                 | 1              |
| AF398480         | Saccharomyces    | kudriavzevii   |                                         |  |                                             |  | 494                 | 1              |
| AY130340         | Saccharomyces    | kunashirensis  |                                         |  |                                             |  | 494                 | 1              |
| AY130338         | Saccharomyces    | pastorianus    |                                         |  |                                             |  | 494                 | 1              |
| AF406921         | Saccharomyces    | servazzii      |                                         |  |                                             |  | 494                 | 1              |
| AB087391         | Saccharomyces    | sp             |                                         |  |                                             |  | 494                 | 1              |
| AF398485         | Saccharomyces    | turicensis     |                                         |  |                                             |  | 494                 | 1              |
| AY007920         | Saccharomyces    | unisporus      |                                         |  |                                             |  | 494                 | 1              |
| SUV279065        | Saccharomyces    | uvarum         |                                         |  |                                             |  | 494                 | 1              |
| AF285782         | Sagenoma         | viride         |                                         |  |                                             |  | 494                 | 1              |
| AY213628         | Scytalidium      | hyalinum       |                                         |  |                                             |  | 494                 | 1              |
| AF506469         | Scytinostroma    | odoratum       |                                         |  |                                             |  | 494                 | 1              |
| AF506472         | Scytinostromella | nannfeldti     |                                         |  |                                             |  | 494                 | 1              |
| AF291364         | Sebacina         | dimitica       |                                         |  |                                             |  | 494                 | 1              |
| AF440660         | Sebacina         | endomycorrhiza |                                         |  |                                             |  | 494                 | 1              |
| AY505553         | Sebacina         | vermifera      |                                         |  |                                             |  | 494                 | 1              |
| SEB534931        | Sebacinaceae     | sp             |                                         |  |                                             |  | 494                 | 1              |
| AF518648         | Serpula          | himantoides    |                                         |  |                                             |  | 494                 | 1              |
| AY491673         | Serpula          | incrassata     |                                         |  |                                             |  | 494                 | 1              |
| SLA440941        | Serpula          | lacrymans      |                                         |  |                                             |  | 494                 | 1              |
| AY039334         | Stereum          | hirsutum       |                                         |  |                                             |  | 494                 | 1              |
| AF506480         | Stereum          | reflexulum     |                                         |  |                                             |  | 494                 | 1              |
| AF506481         | Stereum          | rugosum        |                                         |  |                                             |  | 494                 | 1              |
| AF506483         | Stereum          | sp             |                                         |  |                                             |  | 494                 | 1              |
| AF506482         | Stereum          | subtomentosum  |                                         |  |                                             |  | 494                 | 1              |
| AY341361         | Stictis          | radiata        |                                         |  |                                             |  | 494                 | 1              |
| AF195597         | Stropharia       | aeruginosa     |                                         |  |                                             |  | 494                 | 1              |
| AF195589         | Stropharia       | albocrenulata  |                                         |  |                                             |  | 494                 | 1              |
| AF291368         | Stropharia       | albonitens     |                                         |  |                                             |  | 494                 | 1              |
| AY646102         | Stropharia       | ambigua        |                                         |  |                                             |  | 494                 | 1              |
| AF261626         | Stropharia       | umbonescens    |                                         |  |                                             |  | 494                 | 1              |
| AB047218         | Talaromyces      | eburneus       |                                         |  |                                             |  | 494                 | 1              |
| AB047219         | Talaromyces      | emersonii      |                                         |  |                                             |  | 494                 | 1              |
| AB047227         | Talaromyces      | luteus         |                                         |  |                                             |  | 494                 | 1              |
| AF388747         | Thaxterogaster   | campbellae     |                                         |  |                                             |  | 494                 | 1              |
| AF287890         | Thelephora       | sp             |                                         |  |                                             |  | 494                 | 1              |
| AF291371         | Trametes         | gibbosa        |                                         |  |                                             |  | 494                 | 1              |
| TTR457810        | Trametes         | trogii         |                                         |  |                                             |  | 494                 | 1              |
| AY635768         | Trechispora      | alnicola       |                                         |  |                                             |  | 494                 | 1              |
| AF347084         | Trechispora      | araneosa       |                                         |  |                                             |  | 494                 | 1              |
| AF347081         | Trechispora      | confinis       |                                         |  |                                             |  | 494                 | 1              |
| AF347085         | Trechispora      | incisa         |                                         |  |                                             |  | 494                 | 1              |
| AF384862         | Tremellodendron  | pallidum       |                                         |  |                                             |  | 494                 | 1              |
| AY745701         | Tremellodendron  | sp             |                                         |  |                                             |  | 494                 | 1              |
| AF291377         | Tremiscus        | helvelloides   |                                         |  |                                             |  | 494                 | 1              |
| TVE406424        | Tubulicium       | vermiculare    |                                         |  |                                             |  | 494                 | 1              |
| AY612832         | Tylopilus        | alboater       |                                         |  |                                             |  | 494                 | 1              |
| AY612833         | Tylopilus        | badiceps       |                                         |  |                                             |  | 494                 | 1              |
| AY612835         | Tylopilus        | rufonigricans  |                                         |  |                                             |  | 494                 | 1              |
| AF456813         | Tylopilus        | sp             |                                         |  |                                             |  | 494                 | 1              |
| AY612837         | Tylopilus        | tabacinus      |                                         |  |                                             |  | 494                 | 1              |
| AY300869         | Umbilicaria      | crustulosa     |                                         |  |                                             |  | 494                 | 1              |
| AY645334         | Umbilicaria      | esculenta      |                                         |  |                                             |  | 494                 | 1              |
| AY645335         | Umbilicaria      | mammulata      |                                         |  |                                             |  | 494                 | 1              |
| AY645337         | Umbilicaria      | muehlenbergii  |                                         |  |                                             |  | 494                 | 1              |
| AY645339         | Umbilicaria      | subglabra      |                                         |  |                                             |  | 494                 | 1              |
| AY634136         | Uncultured       | ectomycorrhiza |                                         |  |                                             |  | 494                 | 1              |
| AY536734         | Uncultured       | fungus         |                                         |  |                                             |  | 494                 | 1              |
| AY452679         | Uncultured       | mycorrhiza     |                                         |  |                                             |  | 494                 | 1              |
| AF042563         | Unidentified     | basidiomycete  |                                         |  |                                             |  | 494                 | 1              |

| Accession Number | Genus           | Species          | 28S |   | 3' end |    | NLB4 |   | 3' end |   | NLC2 |   | Species per cluster | Cluster number |   |   |   |   |   |   |
|------------------|-----------------|------------------|-----|---|--------|----|------|---|--------|---|------|---|---------------------|----------------|---|---|---|---|---|---|
|                  |                 |                  | G   | T | C      | A  | T    | A | G      | A | G    | T |                     |                | T | G | G | A | A | T |
| AF506484         | Vararia         | investiens       |     |   |        |    |      |   |        |   |      |   | 494                 | 1              |   |   |   |   |   |   |
| AY293218         | Vararia         | sphaericospora   |     |   |        |    |      |   |        |   |      |   | 494                 | 1              |   |   |   |   |   |   |
| AF261639         | Werarora        | virescens        |     |   |        |    |      |   |        |   |      |   | 494                 | 1              |   |   |   |   |   |   |
| AF514809         | Xerocomus       | chrysenteron     |     |   |        |    |      |   |        |   |      |   | 494                 | 1              |   |   |   |   |   |   |
| AF514813         | Xerocomus       | cisalpinus       |     |   |        |    |      |   |        |   |      |   | 494                 | 1              |   |   |   |   |   |   |
| AF139712         | Xerocomus       | depilatus        |     |   |        |    |      |   |        |   |      |   | 494                 | 1              |   |   |   |   |   |   |
| AF514823         | Xerocomus       | dryophilus       |     |   |        |    |      |   |        |   |      |   | 494                 | 1              |   |   |   |   |   |   |
| AF514821         | Xerocomus       | fennicus         |     |   |        |    |      |   |        |   |      |   | 494                 | 1              |   |   |   |   |   |   |
| AY612840         | Xerocomus       | illudens         |     |   |        |    |      |   |        |   |      |   | 494                 | 1              |   |   |   |   |   |   |
| AF514825         | Xerocomus       | pruinatus        |     |   |        |    |      |   |        |   |      |   | 494                 | 1              |   |   |   |   |   |   |
| AF514816         | Xerocomus       | ripariellus      |     |   |        |    |      |   |        |   |      |   | 494                 | 1              |   |   |   |   |   |   |
| AY612841         | Xerocomus       | sp               |     |   |        |    |      |   |        |   |      |   | 494                 | 1              |   |   |   |   |   |   |
| AY612842         | Xerocomus       | spadiceus        |     |   |        |    |      |   |        |   |      |   | 494                 | 1              |   |   |   |   |   |   |
| AF514832         | Xerocomus       | subtomentosus    |     |   |        |    |      |   |        |   |      |   | 494                 | 1              |   |   |   |   |   |   |
| AF261462         | Xeromphalina    | campanelloides   |     |   |        |    |      |   |        |   |      |   | 494                 | 1              |   |   |   |   |   |   |
| AF261463         | Xeromphalina    | cornui           |     |   |        |    |      |   |        |   |      |   | 494                 | 1              |   |   |   |   |   |   |
| AF261464         | Xeromphalina    | fraxinophila     |     |   |        |    |      |   |        |   |      |   | 494                 | 1              |   |   |   |   |   |   |
| AY039307         | Xylobolus       | frustulatus      |     |   |        |    |      |   |        |   |      |   | 494                 | 1              |   |   |   |   |   |   |
| AY039309         | Xylobolus       | subpileatus      |     |   |        |    |      |   |        |   |      |   | 494                 | 1              |   |   |   |   |   |   |
| AF265545         | Zelleromyces    | sculptisporus    |     |   |        |    |      |   |        |   |      |   | 494                 | 1              |   |   |   |   |   |   |
| AY075113         | Acanthorhynchus | vaccinii         | C   |   |        | GC |      |   | A      |   | T    |   | 76                  | 2              |   |   |   |   |   |   |
| AF132319         | Annulatascus    | hongkongensis    | C   |   |        | GC |      |   | A      |   | T    |   | 76                  | 2              |   |   |   |   |   |   |
| AF132320         | Annulatascus    | velatisporus     | C   |   |        | GC |      |   | A      |   | T    |   | 76                  | 2              |   |   |   |   |   |   |
| AF096186         | Aporothielavia  | leptoderma       | C   |   |        | GC |      |   | A      |   | T    |   | 76                  | 2              |   |   |   |   |   |   |
| AF327386         | Aschersonia     | badia            | C   |   |        | GC |      |   | A      |   | T    |   | 76                  | 2              |   |   |   |   |   |   |
| AS17397          | Atkinsonella    | sp               | C   |   |        | GC |      |   | A      |   | T    |   | 76                  | 2              |   |   |   |   |   |   |
| BSU57679         | Balansia        | strangulans      | C   |   |        | GC |      |   | A      |   | T    |   | 76                  | 2              |   |   |   |   |   |   |
| AF339520         | Beauveria       | caledonica       | C   |   |        | GC |      |   | A      |   | T    |   | 76                  | 2              |   |   |   |   |   |   |
| AY346270         | Ceratosphaeria  | lampadophora     | C   |   |        | GC |      |   | A      |   | T    |   | 76                  | 2              |   |   |   |   |   |   |
| AF132328         | Cercophora      | appalachianensis | C   |   |        | GC |      |   | A      |   | T    |   | 76                  | 2              |   |   |   |   |   |   |
| AF286400         | Chaetomium      | cupreum          | C   |   |        | GC |      |   | A      |   | T    |   | 76                  | 2              |   |   |   |   |   |   |
| CG47825          | Chaetomium      | globosum         | C   |   |        | GC |      |   | A      |   | T    |   | 76                  | 2              |   |   |   |   |   |   |
| CQU312104        | Chaetomium      | quadrangulatum   | C   |   |        | GC |      |   | A      |   | T    |   | 76                  | 2              |   |   |   |   |   |   |
| AJ583471         | Cladobotryum    | dimorphicum      | C   |   |        | GC |      |   | A      |   | T    |   | 76                  | 2              |   |   |   |   |   |   |
| AF160229         | Cladobotryum    | stereicola       | C   |   |        | GC |      |   | A      |   | T    |   | 76                  | 2              |   |   |   |   |   |   |
| AF245294         | Claviceps       | africana         | C   |   |        | GC |      |   | A      |   | T    |   | 76                  | 2              |   |   |   |   |   |   |
| AF009654         | Cordycepioideus | bisporus         | C   |   |        | GC |      |   | A      |   | T    |   | 76                  | 2              |   |   |   |   |   |   |
| AY283555         | Cordyceps       | bassiana         | C   |   |        | GC |      |   | A      |   | T    |   | 76                  | 2              |   |   |   |   |   |   |
| AB031196         | Cordyceps       | coccidiicola     | C   |   |        | GC |      |   | A      |   | T    |   | 76                  | 2              |   |   |   |   |   |   |
| AB027377         | Cordyceps       | cochliidiicola   | C   |   |        | GC |      |   | A      |   | T    |   | 76                  | 2              |   |   |   |   |   |   |
| AB027365         | Cordyceps       | jezoensis        | C   |   |        | GC |      |   | A      |   | T    |   | 76                  | 2              |   |   |   |   |   |   |
| AY465959         | Cordyceps       | kyushuensis      | C   |   |        | GC |      |   | A      |   | T    |   | 76                  | 2              |   |   |   |   |   |   |
| AY184966         | Cordyceps       | militaris        | C   |   |        | GC |      |   | A      |   | T    |   | 76                  | 2              |   |   |   |   |   |   |
| AB027370         | Cordyceps       | prolifera        | C   |   |        | GC |      |   | A      |   | T    |   | 76                  | 2              |   |   |   |   |   |   |
| AB067738         | Cordyceps       | sinensis         | C   |   |        | GC |      |   | A      |   | T    |   | 76                  | 2              |   |   |   |   |   |   |
| AB027374         | Cordyceps       | sobolifera       | C   |   |        | GC |      |   | A      |   | T    |   | 76                  | 2              |   |   |   |   |   |   |
| AB027375         | Cordyceps       | sp               | C   |   |        | GC |      |   | A      |   | T    |   | 76                  | 2              |   |   |   |   |   |   |
| AB044643         | Cordyceps       | yakusimensis     | C   |   |        | GC |      |   | A      |   | T    |   | 76                  | 2              |   |   |   |   |   |   |
| AY489734         | Cosmospora      | coccinea         | C   |   |        | GC |      |   | A      |   | T    |   | 76                  | 2              |   |   |   |   |   |   |
| AY015625         | Cosmospora      | episphaeria      | C   |   |        | GC |      |   | A      |   | T    |   | 76                  | 2              |   |   |   |   |   |   |
| AY015626         | Cosmospora      | vilior           | C   |   |        | GC |      |   | A      |   | T    |   | 76                  | 2              |   |   |   |   |   |   |
| ETU57083         | Echinodothis    | tuberiformis     | C   |   |        | GC |      |   | A      |   | T    |   | 76                  | 2              |   |   |   |   |   |   |
| AF228356         | Fusarium        | cavispermum      | C   |   |        | GC |      |   | A      |   | T    |   | 76                  | 2              |   |   |   |   |   |   |
| AF130379         | Fusarium        | dimerum          | C   |   |        | GC |      |   | A      |   | T    |   | 76                  | 2              |   |   |   |   |   |   |
| AF228352         | Fusarium        | epistroma        | C   |   |        | GC |      |   | A      |   | T    |   | 76                  | 2              |   |   |   |   |   |   |
| AF228353         | Fusarium        | melanochlorum    | C   |   |        | GC |      |   | A      |   | T    |   | 76                  | 2              |   |   |   |   |   |   |
| FMU88112         | Fusarium        | merismoides      | C   |   |        | GC |      |   | A      |   | T    |   | 76                  | 2              |   |   |   |   |   |   |
| AF228359         | Fusarium        | sp               | C   |   |        | GC |      |   | A      |   | T    |   | 76                  | 2              |   |   |   |   |   |   |
| HT47831          | Hirsutella      | thompsonii       | C   |   |        | GC |      |   | A      |   | T    |   | 76                  | 2              |   |   |   |   |   |   |
| AF213029         | Hypomyces       | corticicola      | C   |   |        | GC |      |   | A      |   | T    |   | 76                  | 2              |   |   |   |   |   |   |
| AF160238         | Hypomyces       | mycophilus       | C   |   |        | GC |      |   | A      |   | T    |   | 76                  | 2              |   |   |   |   |   |   |
| AF160243         | Hypomyces       | stephanomatis    | C   |   |        | GC |      |   | A      |   | T    |   | 76                  | 2              |   |   |   |   |   |   |
| AY346290         | Leptospora      | gregaria         | C   |   |        | GC |      |   | A      |   | T    |   | 76                  | 2              |   |   |   |   |   |   |
| MF17404          | Melanospora     | fallax           | C   |   |        | GC |      |   | A      |   | T    |   | 76                  | 2              |   |   |   |   |   |   |
| AF339531         | Metarhizium     | flavoviride      | C   |   |        | GC |      |   | A      |   | T    |   | 76                  | 2              |   |   |   |   |   |   |
| AY554248         | Nalanthamala    | diospyri         | C   |   |        | GC |      |   | A      |   | T    |   | 76                  | 2              |   |   |   |   |   |   |
| AY554259         | Nalanthamala    | guajavae         | C   |   |        | GC |      |   | A      |   | T    |   | 76                  | 2              |   |   |   |   |   |   |
| AY554247         | Nalanthamala    | sp               | C   |   |        | GC |      |   | A      |   | T    |   | 76                  | 2              |   |   |   |   |   |   |
| AY554263         | Nalanthamala    | vermoesenii      | C   |   |        | GC |      |   | A      |   | T    |   | 76                  | 2              |   |   |   |   |   |   |
| NAU88122         | Nectria         | aurantiaca       | C   |   |        | GC |      |   | A      |   | T    |   | 76                  | 2              |   |   |   |   |   |   |
| NCRGND           | Nectria         | cinnabarina      | C   |   |        | GC |      |   | A      |   | T    |   | 76                  | 2              |   |   |   |   |   |   |
| NC17407          | Nectria         | cosmariospora    | C   |   |        | GC |      |   | A      |   | T    |   | 76                  | 2              |   |   |   |   |   |   |
| NEU88100         | Nectria         | episphaeria      | C   |   |        | GC |      |   | A      |   | T    |   | 76                  | 2              |   |   |   |   |   |   |
| NFU88103         | Nectria         | flammea          | C   |   |        | GC |      |   | A      |   | T    |   | 76                  | 2              |   |   |   |   |   |   |
| AY138481         | Nectria         | mauritiicola     | C   |   |        | GC |      |   | A      |   | T    |   | 76                  | 2              |   |   |   |   |   |   |
| NP17410          | Nectria         | pseudotruchia    | C   |   |        | GC |      |   | A      |   | T    |   | 76                  | 2              |   |   |   |   |   |   |
| NPU88099         | Nectria         | purtonii         | C   |   |        | GC |      |   | A      |   | T    |   | 76                  | 2              |   |   |   |   |   |   |
| FVRGN            | Nectria         | ventricosa       | C   |   |        | GC |      |   | A      |   | T    |   | 76                  | 2              |   |   |   |   |   |   |
| NVU57348         | Nectria         | vilior           | C   |   |        | GC |      |   | A      |   | T    |   | 76                  | 2              |   |   |   |   |   |   |





| Accession Number | 28S Genus         | Species       | 3' end NLB4 |    |     |   | 3' end NLC2 |   |   |    | Species per cluster | Cluster number |   |     |    |    |    |
|------------------|-------------------|---------------|-------------|----|-----|---|-------------|---|---|----|---------------------|----------------|---|-----|----|----|----|
|                  |                   |               | G           | T  | C   | A | G           | A | G | T  |                     |                | C | A   |    |    |    |
| AF098398         | Gomphidius        | glutinosus    |             |    | GC  |   |             |   |   |    |                     |                | 4 | 13  |    |    |    |
| AF356665         | Lasallia          | pennsylvanica |             |    | GC  |   |             |   |   |    |                     |                | 4 | 13  |    |    |    |
| AY645059         | Paxillus          | vernalis      |             |    | GC  |   |             |   |   |    |                     |                | 4 | 13  |    |    |    |
| AY548810         | Dendrographa      | leucophaea    |             |    | C   |   |             |   |   |    |                     |                | 3 | 14  |    |    |    |
| AY548812         | Lecanactis        | abietina      |             |    | C   |   |             |   |   |    |                     |                | 3 | 14  |    |    |    |
| AY548815         | Schismatomma      | decolorans    |             |    | C   |   |             |   |   |    |                     |                | 3 | 14  |    |    |    |
| AF274100         | Pertusaria        | erythrella    |             |    | C   |   |             |   |   |    |                     |                | 3 | 15  |    |    |    |
| AF274099         | Pertusaria        | scaberula     |             |    | C   |   |             |   |   |    |                     |                | 3 | 15  |    |    |    |
| AY300854         | Pertusaria        | subventosa    |             |    | C   |   |             |   |   |    |                     |                | 3 | 15  |    |    |    |
| AY583331         | Marchandiomyces   | corallinus    | A           |    |     |   |             |   |   | C  |                     |                | G | 2   | 16 |    |    |
| AY583332         | Marchandiomyces   | lignicola     | A           |    |     |   |             |   |   | C  |                     |                | G | 2   | 16 |    |    |
| CRO312102        | Chaetomium        | robustum      | C           | A  |     |   |             |   |   | A  |                     |                | T | 2   | 17 |    |    |
| AF396873         | Natantispora      | lotica        | C           | A  |     |   |             |   |   | A  |                     |                | T | 2   | 17 |    |    |
| AY346256         | Albertiniella     | sp            | C           |    |     |   |             |   |   | A  | C                   |                | T | 2   | 18 |    |    |
| AY346283         | Helminthosphaeria | clavariar     | C           |    |     |   |             |   |   | A  | C                   |                | T | 2   | 18 |    |    |
| AF339518         | Aphanocladium     | album         | C           |    |     |   | N           |   |   | A  |                     |                | T | 2   | 19 |    |    |
| AF339565         | Lecanicillium     | attenuatum    | C           |    |     |   | N           |   |   | A  |                     |                | T | 2   | 19 |    |    |
| AY548814         | Roccella          | boergesenii   | C           | C  |     |   |             |   |   | GC |                     |                |   | 2   | 20 |    |    |
| AY584654         | Roccella          | fuciformis    | C           | C  |     |   |             |   |   | GC |                     |                |   | 2   | 20 |    |    |
| AY016363         | Lojkania          | enalia        |             |    | C   |   |             |   |   | C  |                     |                |   | 2   | 21 |    |    |
| AF284133         | Salal             | root          |             |    | C   |   |             |   |   | C  |                     |                |   | 2   | 21 |    |    |
| AD29795          | Aspergillus       | deflectus     |             |    | G   |   |             |   |   | GC |                     |                |   | 2   | 22 |    |    |
| AF433068         | Aspergillus       | lucknowensis  |             |    | G   |   |             |   |   | GC |                     |                |   | 2   | 22 |    |    |
| AF398484         | Kluyveromyces     | sinensis      |             |    |     |   |             |   |   | C  |                     |                |   | 2   | 23 |    |    |
| AF291358         | Protomerulius     | africanus     |             |    |     |   |             |   |   | C  |                     |                |   | 2   | 23 |    |    |
| PGI488126        | Pseudotrametes    | gibbosa       |             |    |     |   |             |   |   | C  |                     |                |   | G   | 2  | 24 |    |
| AY586703         | Pycnoporus        | cinnabarinus  |             |    |     |   |             |   |   | C  |                     |                |   | G   | 2  | 24 |    |
| AY219387         | Crustoderma       | flavescens    |             |    | T   |   |             |   |   | A  |                     |                |   | 2   | 25 |    |    |
| AY219388         | Crustoderma       | longicystidia |             |    | T   |   |             |   |   | A  |                     |                |   | 2   | 25 |    |    |
| AY219386         | Crustoderma       | cornea        | A           |    | C   |   |             |   |   | A  |                     |                |   | 1   | 26 |    |    |
| AF141633         | Phlebia           | tristis       | A           |    | T   |   |             |   |   | A  |                     |                |   | 1   | 27 |    |    |
| AY350578         | Arthonia          | dispersa      | C           | C  |     |   | A           |   |   | GC |                     |                |   | 1   | 28 |    |    |
| AY350580         | Combea            | mollusca      | C           | C  |     |   |             |   |   | GC |                     |                |   | 1   | 29 |    |    |
| AF339535         | Rotiferophthora   | angustispor   | C           | C  |     |   | N           |   |   | GC |                     |                |   | 1   | 30 |    |    |
| AF440664         | Sebacina          | sp            | C           |    |     |   |             |   |   |    |                     |                |   | 1   | 31 |    |    |
| CP47826          | Claviceps         | paspali       | C           |    |     |   | T           |   |   | GC |                     |                |   | A   | 1  | 32 |    |
| AY346269         | Caudatispora      | biapiculata   | C           | GC |     |   |             |   |   | GC |                     |                |   | C A | 1  | 33 |    |
| AY227118         | Littispora        | abonnis       | C           | GC |     |   | N           |   |   | GC |                     |                |   | A   | 1  | 34 |    |
| VR44092          | Varicosporina     | ramulosa      | C           | GG |     |   |             |   |   | GC |                     |                |   | A   | 1  | 35 |    |
| AF539469         | Sagaaromyces      | abonnis       | C           | G  |     |   |             |   |   | GC |                     |                |   | A   | 1  | 36 |    |
| AY648106         | Rhizoplaca        | orientalis    |             |    | C   |   |             |   |   |    |                     |                |   | C   | 1  | 37 |    |
| AF291315         | Ductifera         | pululahuana   |             |    | G   |   |             |   |   |    |                     |                |   | A   | 1  | 38 |    |
| HCI406450        | Hyphodontia       | cineracea     |             |    |     |   | A           |   |   |    |                     |                |   |     | 1  | 39 |    |
| AF218544         | Russula           | adusta        |             |    |     |   | C           |   |   |    |                     |                |   |     | 1  | 40 |    |
| AY509553         | Eichleriella      | leveilleana   |             |    |     |   |             |   |   |    |                     |                |   | T   | 1  | 41 |    |
| AF139959         | Hohenbuehelia     | portegna      |             |    |     |   |             |   |   |    |                     |                |   | N   | 1  | 42 |    |
| AY174781         | Cortinarius       | infractus     |             |    |     |   |             |   |   | G  |                     |                |   |     | 1  | 43 |    |
| AY300870         | Umbilicaria       | proboscidea   |             |    |     |   |             |   |   | G  |                     |                |   |     | 1  | 44 |    |
| AF005703         | Saccharomyces     | paradoxus     |             |    |     |   |             |   |   | C  |                     |                |   |     | 1  | 45 |    |
| AF291329         | Exidiopsis        | sp            |             |    |     |   |             |   |   | G  |                     |                |   |     | 1  | 46 |    |
| AY177250         | Rhizopogon        | subareolatus  |             |    |     |   | N           |   |   | A  |                     |                |   |     | 1  | 47 |    |
| AY509550         | Efibulobasidium   | rolleyi       |             |    |     |   | G           |   |   |    |                     |                |   |     | 1  | 48 |    |
| AF279408         | Schismatomma      | pericleum     |             |    | C A |   |             |   |   | GC |                     |                |   |     | 1  | 49 |    |
| AF274101         | Pertusaria        | amara         |             |    | CC  |   |             |   |   | G  |                     |                |   |     | 1  | 50 |    |
| AF279400         | Mycopepon         | smithii       |             |    | GC  |   |             |   |   |    |                     |                |   | C   | 1  | 51 |    |
| AY394689         | Uncultured        | ascomycete    |             |    | GC  |   |             |   |   | G  |                     |                |   |     | 1  | 52 |    |
| AP29807          | Aspergillus       | parvulus      |             |    | GG  |   |             |   |   |    |                     |                |   |     | 1  | 53 |    |
| AF279376         | Arthrotraphis     | citrinella    |             |    | GG  |   |             |   |   | G  |                     |                |   |     | 1  | 54 |    |
| AF291295         | Basidioidendron   | cinereum      |             |    | G   |   |             |   |   |    |                     |                |   | A   | 1  | 55 |    |
| HAL406453        | Hyphodontia       | alutacea      |             |    | N   |   | A           |   |   |    |                     |                |   |     | 1  | 56 |    |
| AF071528         | Boletus           | satanas       |             |    | N   |   |             |   |   |    |                     |                |   |     | 1  | 57 |    |
| AF291337         | Heterochaetella   | dubia         | K           |    |     |   |             |   |   |    |                     |                |   |     | 1  | 58 |    |
| AY174810         | Cortinarius       | scaurus       | R           |    |     |   |             |   |   |    |                     |                |   |     | 1  | 59 |    |
| AY612802         | Boletus           | edulis        | R           |    |     |   | G           |   |   |    |                     |                |   |     | 1  | 60 |    |
| AF291348         | Myxarium          | granulum      | T           |    |     |   |             |   |   |    |                     |                |   | T   | 1  | 61 |    |
| AF479200         | Abelia            | triflora      | C           | GG |     |   |             |   |   | GC |                     |                |   | G   | C  | 93 | 62 |
| AY189029         | Actinotus         | helianthi     | C           | GG |     |   |             |   |   | GC |                     |                |   | G   | C  | 93 | 62 |
| AY260009         | Alangium          | chinense      | C           | GG |     |   |             |   |   | GC |                     |                |   | G   | C  | 93 | 62 |
| AY260007         | Alangium          | kurzii        | C           | GG |     |   |             |   |   | GC |                     |                |   | G   | C  | 93 | 62 |
| AF297544         | Alangium          | platanifolium | C           | GG |     |   |             |   |   | GC |                     |                |   | G   | C  | 93 | 62 |
| AF479162         | Alangium          | sp            | C           | GG |     |   |             |   |   | GC |                     |                |   | G   | C  | 93 | 62 |
| AF479208         | Altingia          | excelsa       | C           | GG |     |   |             |   |   | GC |                     |                |   | G   | C  | 93 | 62 |
| AY189032         | Anginon           | rugosum       | C           | GG |     |   |             |   |   | GC |                     |                |   | G   | C  | 93 | 62 |
| AF479222         | Aralia            | sp            | C           | GG |     |   |             |   |   | GC |                     |                |   | G   | C  | 93 | 62 |
| AY189035         | Aralia            | spinosa       | C           | GG |     |   |             |   |   | GC |                     |                |   | G   | C  | 93 | 62 |
| AY189037         | Arctopus          | echinatus     | C           | GG |     |   |             |   |   | GC |                     |                |   | G   | C  | 93 | 62 |
| AY189039         | Arthrophyllum     | mackeei       | C           | GG |     |   |             |   |   | GC |                     |                |   | G   | C  | 93 | 62 |
| AY189040         | Astrantia         | major         | C           | GG |     |   |             |   |   | GC |                     |                |   | G   | C  | 93 | 62 |
| AY034040         | Athrotaxis        | cupressoides  | C           | GG |     |   |             |   |   | GC |                     |                |   | G   | C  | 93 | 62 |

| Accession Number | Genus           | Species           | 28S |   |   | 3' end | NLB4 | 3' end | NLC2 | Species per cluster | Cluster number |    |   |   |   |   |   |   |   |   |   |   |   |   |
|------------------|-----------------|-------------------|-----|---|---|--------|------|--------|------|---------------------|----------------|----|---|---|---|---|---|---|---|---|---|---|---|---|
|                  |                 |                   | G   | T | C | A      | T    | A      | G    |                     |                | A  | G | G | G | T | T | G | G | G | A | T | G | C |
| AY034042         | Athrotaxis      | selaginoides      | C   | G | G |        |      | G      |      | C                   | 93             | 62 |   |   |   |   |   |   |   |   |   |   |   |   |
| AY189044         | Azorella        | macquariensis     | C   | G | G |        |      | G      |      | C                   | 93             | 62 |   |   |   |   |   |   |   |   |   |   |   |   |
| AY189046         | Azorella        | selago            | C   | G | G |        |      | G      |      | C                   | 93             | 62 |   |   |   |   |   |   |   |   |   |   |   |   |
| AF479246         | Barnadesia      | caryophylla       | C   | G | G |        |      | G      |      | C                   | 93             | 62 |   |   |   |   |   |   |   |   |   |   |   |   |
| AY292902         | Brasenia        | schreberi         | C   | G | G |        |      | G      |      | C                   | 93             | 62 |   |   |   |   |   |   |   |   |   |   |   |   |
| AF479112         | Brexia          | madagascariensis  | C   | G | G |        |      | G      |      | C                   | 93             | 62 |   |   |   |   |   |   |   |   |   |   |   |   |
| AF479191         | Campanula       | trachelium        | C   | G | G |        |      | G      |      | C                   | 93             | 62 |   |   |   |   |   |   |   |   |   |   |   |   |
| AY260010         | Camptotheca     | acuminata         | C   | G | G |        |      | G      |      | C                   | 93             | 62 |   |   |   |   |   |   |   |   |   |   |   |   |
| AF389240         | Caulophyllum    | thalictroides     | C   | G | G |        |      | G      |      | C                   | 93             | 62 |   |   |   |   |   |   |   |   |   |   |   |   |
| AY189054         | Centella        | erecta            | C   | G | G |        |      | G      |      | C                   | 93             | 62 |   |   |   |   |   |   |   |   |   |   |   |   |
| AF274639         | Cercidiphyllum  | japonicum         | C   | G | G |        |      | G      |      | C                   | 93             | 62 |   |   |   |   |   |   |   |   |   |   |   |   |
| AY189055         | Cheirodendron   | trigynum          | C   | G | G |        |      | G      |      | C                   | 93             | 62 |   |   |   |   |   |   |   |   |   |   |   |   |
| AF479190         | Codonopsis      | pilosula          | C   | G | G |        |      | G      |      | C                   | 93             | 62 |   |   |   |   |   |   |   |   |   |   |   |   |
| AY260011         | Cornus          | disciflora        | C   | G | G |        |      | G      |      | C                   | 93             | 62 |   |   |   |   |   |   |   |   |   |   |   |   |
| AF297533         | Cornus          | kousa             | C   | G | G |        |      | G      |      | C                   | 93             | 62 |   |   |   |   |   |   |   |   |   |   |   |   |
| AF297535         | Cornus          | mas               | C   | G | G |        |      | G      |      | C                   | 93             | 62 |   |   |   |   |   |   |   |   |   |   |   |   |
| AF297539         | Cornus          | oblonga           | C   | G | G |        |      | G      |      | C                   | 93             | 62 |   |   |   |   |   |   |   |   |   |   |   |   |
| AF297536         | Cornus          | officinalis       | C   | G | G |        |      | G      |      | C                   | 93             | 62 |   |   |   |   |   |   |   |   |   |   |   |   |
| AF297538         | Cornus          | racemosa          | C   | G | G |        |      | G      |      | C                   | 93             | 62 |   |   |   |   |   |   |   |   |   |   |   |   |
| AF479213         | Coryloopsis     | pauciflora        | C   | G | G |        |      | G      |      | C                   | 93             | 62 |   |   |   |   |   |   |   |   |   |   |   |   |
| AF274642         | Coryloopsis     | sinensis          | C   | G | G |        |      | G      |      | C                   | 93             | 62 |   |   |   |   |   |   |   |   |   |   |   |   |
| CJU90703         | Cryptomeria     | japonica          | C   | G | G |        |      | G      |      | C                   | 93             | 62 |   |   |   |   |   |   |   |   |   |   |   |   |
| CLU90699         | Cunninghamia    | lanceolata        | C   | G | G |        |      | G      |      | C                   | 93             | 62 |   |   |   |   |   |   |   |   |   |   |   |   |
| AY260012         | Curtisia        | dentata           | C   | G | G |        |      | G      |      | C                   | 93             | 62 |   |   |   |   |   |   |   |   |   |   |   |   |
| AY189057         | Cussonia        | spicata           | C   | G | G |        |      | G      |      | C                   | 93             | 62 |   |   |   |   |   |   |   |   |   |   |   |   |
| AY189060         | Dendropanax     | arboreus          | C   | G | G |        |      | G      |      | C                   | 93             | 62 |   |   |   |   |   |   |   |   |   |   |   |   |
| AF205123         | Dioscorea       | macrostachya      | C   | G | G |        |      | G      |      | C                   | 93             | 62 |   |   |   |   |   |   |   |   |   |   |   |   |
| AF274645         | Disanthus       | cercidifolius     | C   | G | G |        |      | G      |      | C                   | 93             | 62 |   |   |   |   |   |   |   |   |   |   |   |   |
| AF479189         | Donatia         | sp                | C   | G | G |        |      | G      |      | C                   | 93             | 62 |   |   |   |   |   |   |   |   |   |   |   |   |
| AY189065         | Eleutherococcus | trifoliatus       | C   | G | G |        |      | G      |      | C                   | 93             | 62 |   |   |   |   |   |   |   |   |   |   |   |   |
| AY189068         | Eryngium        | bourgattii        | C   | G | G |        |      | G      |      | C                   | 93             | 62 |   |   |   |   |   |   |   |   |   |   |   |   |
| AF479113         | Euonymus        | alatus            | C   | G | G |        |      | G      |      | C                   | 93             | 62 |   |   |   |   |   |   |   |   |   |   |   |   |
| AF479219         | Exbucklandia    | populnea          | C   | G | G |        |      | G      |      | C                   | 93             | 62 |   |   |   |   |   |   |   |   |   |   |   |   |
| AY189069         | Fatsia          | japonica          | C   | G | G |        |      | G      |      | C                   | 93             | 62 |   |   |   |   |   |   |   |   |   |   |   |   |
| AY034043         | Glyptostrobus   | pensiilis         | C   | G | G |        |      | G      |      | C                   | 93             | 62 |   |   |   |   |   |   |   |   |   |   |   |   |
| AF479197         | Griselinia      | lucida            | C   | G | G |        |      | G      |      | C                   | 93             | 62 |   |   |   |   |   |   |   |   |   |   |   |   |
| AY260019         | Grubbia         | rosmarinifolia    | C   | G | G |        |      | G      |      | C                   | 93             | 62 |   |   |   |   |   |   |   |   |   |   |   |   |
| AF479183         | Helianthus      | annuus            | C   | G | G |        |      | G      |      | C                   | 93             | 62 |   |   |   |   |   |   |   |   |   |   |   |   |
| AY189074         | Heteromorpha    | trifoliata        | C   | G | G |        |      | G      |      | C                   | 93             | 62 |   |   |   |   |   |   |   |   |   |   |   |   |
| AF223066         | Humulus         | lupulus           | C   | G | G |        |      | G      |      | C                   | 93             | 62 |   |   |   |   |   |   |   |   |   |   |   |   |
| AY189076         | Hydrocotyle     | bowlesiioides     | C   | G | G |        |      | G      |      | C                   | 93             | 62 |   |   |   |   |   |   |   |   |   |   |   |   |
| AF479221         | Hydrocotyle     | sp                | C   | G | G |        |      | G      |      | C                   | 93             | 62 |   |   |   |   |   |   |   |   |   |   |   |   |
| AY189078         | Hydrocotyle     | verticillata      | C   | G | G |        |      | G      |      | C                   | 93             | 62 |   |   |   |   |   |   |   |   |   |   |   |   |
| AY260021         | Hydrostachys    | multifida         | C   | G | G |        |      | G      |      | C                   | 93             | 62 |   |   |   |   |   |   |   |   |   |   |   |   |
| AF146016         | Ipomoea         | lacunosa          | C   | G | G |        |      | G      |      | C                   | 93             | 62 |   |   |   |   |   |   |   |   |   |   |   |   |
| AF148499         | Jacquemontia    | tamnifolia        | C   | G | G |        |      | G      |      | C                   | 93             | 62 |   |   |   |   |   |   |   |   |   |   |   |   |
| AY189080         | Kalopanax       | pictus            | C   | G | G |        |      | G      |      | C                   | 93             | 62 |   |   |   |   |   |   |   |   |   |   |   |   |
| AF479206         | Lambertia       | inermis           | C   | G | G |        |      | G      |      | C                   | 93             | 62 |   |   |   |   |   |   |   |   |   |   |   |   |
| AF274653         | Leea            | guineensis        | C   | G | G |        |      | G      |      | C                   | 93             | 62 |   |   |   |   |   |   |   |   |   |   |   |   |
| AF479217         | Liquidambar     | styraciflua       | C   | G | G |        |      | G      |      | C                   | 93             | 62 |   |   |   |   |   |   |   |   |   |   |   |   |
| AF479160         | Manilkara       | zapota            | C   | G | G |        |      | G      |      | C                   | 93             | 62 |   |   |   |   |   |   |   |   |   |   |   |   |
| AY189085         | Melanophylla    | alnifolia         | C   | G | G |        |      | G      |      | C                   | 93             | 62 |   |   |   |   |   |   |   |   |   |   |   |   |
| AY034044         | Metasequoia     | glyptostroboideis | C   | G | G |        |      | G      |      | C                   | 93             | 62 |   |   |   |   |   |   |   |   |   |   |   |   |
| AY189087         | Micropleura     | renifolia         | C   | G | G |        |      | G      |      | C                   | 93             | 62 |   |   |   |   |   |   |   |   |   |   |   |   |
| AY189088         | Motherwellia    | haplosciadea      | C   | G | G |        |      | G      |      | C                   | 93             | 62 |   |   |   |   |   |   |   |   |   |   |   |   |
| AY189093         | Mulinum         | sp                | C   | G | G |        |      | G      |      | C                   | 93             | 62 |   |   |   |   |   |   |   |   |   |   |   |   |
| AF274656         | Mytilaria       | laosensis         | C   | G | G |        |      | G      |      | C                   | 93             | 62 |   |   |   |   |   |   |   |   |   |   |   |   |
| AF274657         | Paeonia         | brownii           | C   | G | G |        |      | G      |      | C                   | 93             | 62 |   |   |   |   |   |   |   |   |   |   |   |   |
| AF274658         | Paeonia         | californica       | C   | G | G |        |      | G      |      | C                   | 93             | 62 |   |   |   |   |   |   |   |   |   |   |   |   |
| AF274659         | Paeonia         | suffruticosa      | C   | G | G |        |      | G      |      | C                   | 93             | 62 |   |   |   |   |   |   |   |   |   |   |   |   |
| AF274660         | Paeonia         | tenuifolia        | C   | G | G |        |      | G      |      | C                   | 93             | 62 |   |   |   |   |   |   |   |   |   |   |   |   |
| AF274662         | Platanus        | occidentalis      | C   | G | G |        |      | G      |      | C                   | 93             | 62 |   |   |   |   |   |   |   |   |   |   |   |   |
| AF222404         | Pleurostyliia   | opposita          | C   | G | G |        |      | G      |      | C                   | 93             | 62 |   |   |   |   |   |   |   |   |   |   |   |   |
| AY189102         | Polyscias       | guilfoylei        | C   | G | G |        |      | G      |      | C                   | 93             | 62 |   |   |   |   |   |   |   |   |   |   |   |   |
| AY189103         | Pseudopanax     | arboreus          | C   | G | G |        |      | G      |      | C                   | 93             | 62 |   |   |   |   |   |   |   |   |   |   |   |   |
| AY189107         | Sanicula        | gregari           | C   | G | G |        |      | G      |      | C                   | 93             | 62 |   |   |   |   |   |   |   |   |   |   |   |   |
| AY189108         | Schefflera      | arboricola        | C   | G | G |        |      | G      |      | C                   | 93             | 62 |   |   |   |   |   |   |   |   |   |   |   |   |
| SVU90698         | Sciadopitys     | verticillata      | C   | G | G |        |      | G      |      | C                   | 93             | 62 |   |   |   |   |   |   |   |   |   |   |   |   |
| SSU90701         | Sequoia         | sempervirens      | C   | G | G |        |      | G      |      | C                   | 93             | 62 |   |   |   |   |   |   |   |   |   |   |   |   |
| AY034045         | Sequoiadendron  | giganteum         | C   | G | G |        |      | G      |      | C                   | 93             | 62 |   |   |   |   |   |   |   |   |   |   |   |   |
| TCU90700         | Taiwania        | cryptomerioides   | C   | G | G |        |      | G      |      | C                   | 93             | 62 |   |   |   |   |   |   |   |   |   |   |   |   |
| AY056503         | Thuja           | plicata           | C   | G | G |        |      | G      |      | C                   | 93             | 62 |   |   |   |   |   |   |   |   |   |   |   |   |
| TGU90696         | Torreya         | grandis           | C   | G | G |        |      | G      |      | C                   | 93             | 62 |   |   |   |   |   |   |   |   |   |   |   |   |
| AY189113         | Torriceia       | tiliifolia        | C   | G | G |        |      | G      |      | C                   | 93             | 62 |   |   |   |   |   |   |   |   |   |   |   |   |
| AY189114         | Trachymene      | coerulea          | C   | G | G |        |      | G      |      | C                   | 93             | 62 |   |   |   |   |   |   |   |   |   |   |   |   |
| AY189115         | Trevesia        | palmata           | C   | G | G |        |      | G      |      | C                   | 93             | 62 |   |   |   |   |   |   |   |   |   |   |   |   |
| AY189116         | Tupidanthus     | calypratus        | C   | G | G |        |      | G      |      | C                   | 93             | 62 |   |   |   |   |   |   |   |   |   |   |   |   |
| AF479199         | Valeriana       | officinalis       | C   | G | G |        |      | G      |      | C                   | 93             | 62 |   |   |   |   |   |   |   |   |   |   |   |   |
| AF479207         | Vitis           | aestivalis        | C   | G | G |        |      | G      |      | C                   | 93             | 62 |   |   |   |   |   |   |   |   |   |   |   |   |
